# Supplementary material for: Case report: recurrent pituitary adenoma has increased load of somatic variants
Source: PubMed Central journal article supplement (PMC6988340; doi:10.1186/s12902-020-0493-x), 2020-01-29
Supplement: 12902_2020_493_MOESM3_ESM.pdf [file 12902_2020_493_MOESM3_ESM.pdf]

# Qualimap Report: WBC DNA alignment quality metrics

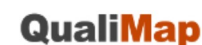

## Input data and parameters

### QualiMap command line

```
qualimap bamqc -bam E:\NGS\Adenomas\Recidivs_5_31_155D8\155D8_gal.bam -gff E:\NGS\Exome_hg19_6fields.bed -os -c -nw 400 -hm 3
```

### Alignment

|                                       |                                                                                                                     |
|---------------------------------------|---------------------------------------------------------------------------------------------------------------------|
| Command line:                         | mapall -f ucsc.hg19.fasta -r 155D8.fastq -i fastq -s 155D8.bam -o 1 stage1 map1 stage2 map2 stage3 map3 stage4 map4 |
| Draw chromosome limits:               | yes                                                                                                                 |
| Analyze overlapping paired-end reads: | no                                                                                                                  |
| Program:                              | tmap (3.4.1)                                                                                                        |
| Analysis date:                        | Mon Nov 07 18:00:20 EET 2016                                                                                        |
| Size of a homopolymer:                | 3                                                                                                                   |
| Skip duplicate alignments:            | no                                                                                                                  |
| Number of windows:                    | 400                                                                                                                 |
| BAM file:                             | E:\NGS\Adenomas\Recidivs_5_31_155D8\155D8_gal.bam                                                                   |

### GFF region

|                     |                               |
|---------------------|-------------------------------|
| Library protocol:   | non-strand-specific           |
| Outside statistics: | yes                           |
| GFF file:           | E:\NGS\Exome_hg19_6fields.bed |

## Summary

### Globals

|                          |                     |
|--------------------------|---------------------|
| Reference size           | 3 137 161 264       |
| Number of reads          | 96 701 200          |
| Mapped reads             | 95 113 193 / 98,36% |
| Unmapped reads           | 1 588 007 / 1,64%   |
| Mapped paired reads      | 0 / 0%              |
| Read min/max/mean length | 25 / 390 / 118,23   |
| Clipped reads            | 14 057 475 / 14,54% |

### Globals (inside of regions)

|                                      |                     |
|--------------------------------------|---------------------|
| Regions size/percentage of reference | 37 259 743 / 1,19%  |
| Mapped reads                         | 27 316 044 / 28,25% |
| Duplicated reads (estimated)         | 9 652 150 / 35,34%  |

## CONTENTS

- [Input data & parameters](#)
- [Summary](#)
- [Coverage across reference](#)
- [Coverage Histogram](#)
- [Coverage Histogram \(0-50X\)](#)
- [Genome Fraction Coverage](#)
- [Duplication Rate Histogram](#)
- [Mapped Reads Nucleotide Content](#)
- [Mapped Reads GC-content Distribution](#)
- [Mapped Reads Clipping Profile](#)
- [Homopolymer Indels](#)
- [Mapping Quality Across Reference](#)
- [Mapping Quality Histogram](#)

|                  |       |
|------------------|-------|
| Duplication rate | 32,2% |
|------------------|-------|

### ACGT Content (inside of regions)

|                          |                      |
|--------------------------|----------------------|
| Number/percentage of A's | 547 451 009 / 24,51% |
| Number/percentage of C's | 570 991 436 / 25,56% |
| Number/percentage of T's | 543 068 252 / 24,31% |
| Number/percentage of G's | 572 329 489 / 25,62% |
| Number/percentage of N's | 0 / 0%               |
| GC Percentage            | 51,18%               |

### Coverage (inside of regions)

|                    |         |
|--------------------|---------|
| Mean               | 60,5114 |
| Standard Deviation | 42,7392 |

### Mapping Quality (inside of regions)

|                      |       |
|----------------------|-------|
| Mean Mapping Quality | 65,71 |
|----------------------|-------|

### Mismatches and indels (inside of regions)

|                                          |            |
|------------------------------------------|------------|
| General error rate                       | 4,27%      |
| Mismatches                               | 49 595 641 |
| Insertions                               | 38 336 007 |
| Mapped reads with at least one insertion | 18,27%     |
| Deletions                                | 29 602 103 |
| Mapped reads with at least one deletion  | 16,11%     |
| Homopolymer indels                       | 48,32%     |

### Chromosome stats (inside of regions)

| Name  | Length  | Mapped bases | Mean coverage | Standard deviation |
|-------|---------|--------------|---------------|--------------------|
| chrM  | 0       | 0            | 0             | 0                  |
| chr1  | 3784540 | 236578358    | 62,5118       | 45,2718            |
| chr2  | 2784129 | 166139593    | 59,6738       | 37,9589            |
| chr3  | 2096186 | 127953961    | 61,0413       | 36,9576            |
| chr4  | 1419494 | 83387280     | 58,7444       | 35,5686            |
| chr5  | 1707093 | 102811806    | 60,2262       | 38,9277            |
| chr6  | 1939714 | 103559933    | 53,3893       | 38,6697            |
| chr7  | 1715393 | 102074252    | 59,5049       | 42,1879            |
| chr8  | 1223260 | 68815048     | 56,2555       | 37,4744            |
| chr9  | 1591797 | 93250318     | 58,5818       | 40,5575            |
| chr10 | 1501994 | 91620244     | 60,9991       | 39,3892            |
| chr11 | 2152291 | 127017423    | 59,015        | 38,1026            |
| chr12 | 1910362 | 114846390    | 60,1176       | 37,5286            |

|                       |         |           |          |         |
|-----------------------|---------|-----------|----------|---------|
| chr13                 | 706110  | 40270904  | 57,0321  | 35,8253 |
| chr14                 | 1194533 | 72228617  | 60,466   | 40,9563 |
| chr15                 | 1229578 | 74199915  | 60,3458  | 39,3183 |
| chr16                 | 1502270 | 86273286  | 57,4286  | 41,4636 |
| chr17                 | 2108732 | 124654331 | 59,1134  | 40,2748 |
| chr18                 | 566305  | 34395766  | 60,7372  | 40,1749 |
| chr19                 | 2381241 | 126325815 | 53,0504  | 41,9467 |
| chr20                 | 922966  | 52746968  | 57,1494  | 39,0903 |
| chr21                 | 401819  | 23057163  | 57,382   | 41,3489 |
| chr22                 | 836825  | 48488562  | 57,9435  | 42,7852 |
| chrX                  | 1493772 | 152304063 | 101,9594 | 73,0393 |
| chrY                  | 89339   | 1639888   | 18,3558  | 31,9905 |
| chr1_gl000191_random  | 0       | 0         | 0        | 0       |
| chr1_gl000192_random  | 0       | 0         | 0        | 0       |
| chr4_ctg9_hap1        | 0       | 0         | 0        | 0       |
| chr4_gl000193_random  | 0       | 0         | 0        | 0       |
| chr4_gl000194_random  | 0       | 0         | 0        | 0       |
| chr6_apd_hap1         | 0       | 0         | 0        | 0       |
| chr6_cox_hap2         | 0       | 0         | 0        | 0       |
| chr6_dbb_hap3         | 0       | 0         | 0        | 0       |
| chr6_mann_hap4        | 0       | 0         | 0        | 0       |
| chr6_mcf_hap5         | 0       | 0         | 0        | 0       |
| chr6_qbl_hap6         | 0       | 0         | 0        | 0       |
| chr6_ssto_hap7        | 0       | 0         | 0        | 0       |
| chr7_gl000195_random  | 0       | 0         | 0        | 0       |
| chr8_gl000196_random  | 0       | 0         | 0        | 0       |
| chr8_gl000197_random  | 0       | 0         | 0        | 0       |
| chr9_gl000198_random  | 0       | 0         | 0        | 0       |
| chr9_gl000199_random  | 0       | 0         | 0        | 0       |
| chr9_gl000200_random  | 0       | 0         | 0        | 0       |
| chr9_gl000201_random  | 0       | 0         | 0        | 0       |
| chr11_gl000202_random | 0       | 0         | 0        | 0       |
| chr17_ctg5_hap1       | 0       | 0         | 0        | 0       |
| chr17_gl000203_random | 0       | 0         | 0        | 0       |
| chr17_gl000204_random | 0       | 0         | 0        | 0       |
| chr17_gl000205_random | 0       | 0         | 0        | 0       |
| chr17_gl000206_random | 0       | 0         | 0        | 0       |
| chr18_gl000207_random | 0       | 0         | 0        | 0       |

|                       |   |   |   |   |
|-----------------------|---|---|---|---|
| chr19_gl000208_random | 0 | 0 | 0 | 0 |
| chr19_gl000209_random | 0 | 0 | 0 | 0 |
| chr21_gl000210_random | 0 | 0 | 0 | 0 |
| chrUn_gl000211        | 0 | 0 | 0 | 0 |
| chrUn_gl000212        | 0 | 0 | 0 | 0 |
| chrUn_gl000213        | 0 | 0 | 0 | 0 |
| chrUn_gl000214        | 0 | 0 | 0 | 0 |
| chrUn_gl000215        | 0 | 0 | 0 | 0 |
| chrUn_gl000216        | 0 | 0 | 0 | 0 |
| chrUn_gl000217        | 0 | 0 | 0 | 0 |
| chrUn_gl000218        | 0 | 0 | 0 | 0 |
| chrUn_gl000219        | 0 | 0 | 0 | 0 |
| chrUn_gl000220        | 0 | 0 | 0 | 0 |
| chrUn_gl000221        | 0 | 0 | 0 | 0 |
| chrUn_gl000222        | 0 | 0 | 0 | 0 |
| chrUn_gl000223        | 0 | 0 | 0 | 0 |
| chrUn_gl000224        | 0 | 0 | 0 | 0 |
| chrUn_gl000225        | 0 | 0 | 0 | 0 |
| chrUn_gl000226        | 0 | 0 | 0 | 0 |
| chrUn_gl000227        | 0 | 0 | 0 | 0 |
| chrUn_gl000228        | 0 | 0 | 0 | 0 |
| chrUn_gl000229        | 0 | 0 | 0 | 0 |
| chrUn_gl000230        | 0 | 0 | 0 | 0 |
| chrUn_gl000231        | 0 | 0 | 0 | 0 |
| chrUn_gl000232        | 0 | 0 | 0 | 0 |
| chrUn_gl000233        | 0 | 0 | 0 | 0 |
| chrUn_gl000234        | 0 | 0 | 0 | 0 |
| chrUn_gl000235        | 0 | 0 | 0 | 0 |
| chrUn_gl000236        | 0 | 0 | 0 | 0 |
| chrUn_gl000237        | 0 | 0 | 0 | 0 |
| chrUn_gl000238        | 0 | 0 | 0 | 0 |
| chrUn_gl000239        | 0 | 0 | 0 | 0 |
| chrUn_gl000240        | 0 | 0 | 0 | 0 |
| chrUn_gl000241        | 0 | 0 | 0 | 0 |
| chrUn_gl000242        | 0 | 0 | 0 | 0 |
| chrUn_gl000243        | 0 | 0 | 0 | 0 |
| chrUn_gl000244        | 0 | 0 | 0 | 0 |
| chrUn_gl000245        | 0 | 0 | 0 | 0 |

|                |   |   |   |   |
|----------------|---|---|---|---|
| chrUn_gl000246 | 0 | 0 | 0 | 0 |
| chrUn_gl000247 | 0 | 0 | 0 | 0 |
| chrUn_gl000248 | 0 | 0 | 0 | 0 |
| chrUn_gl000249 | 0 | 0 | 0 | 0 |

## Coverage across reference

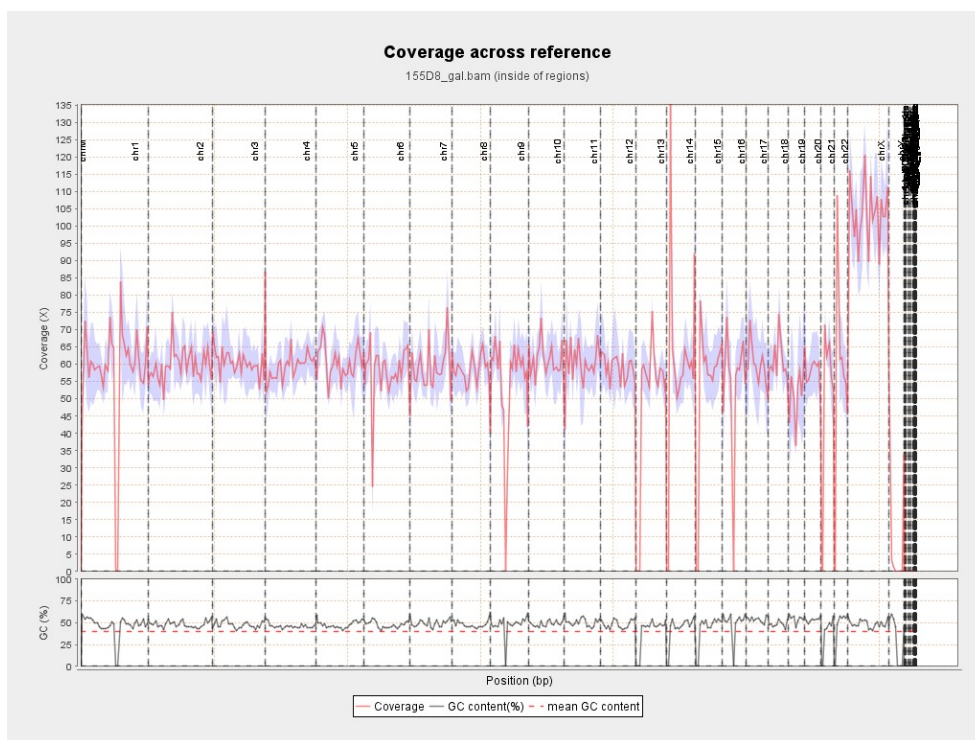

## Coverage Histogram

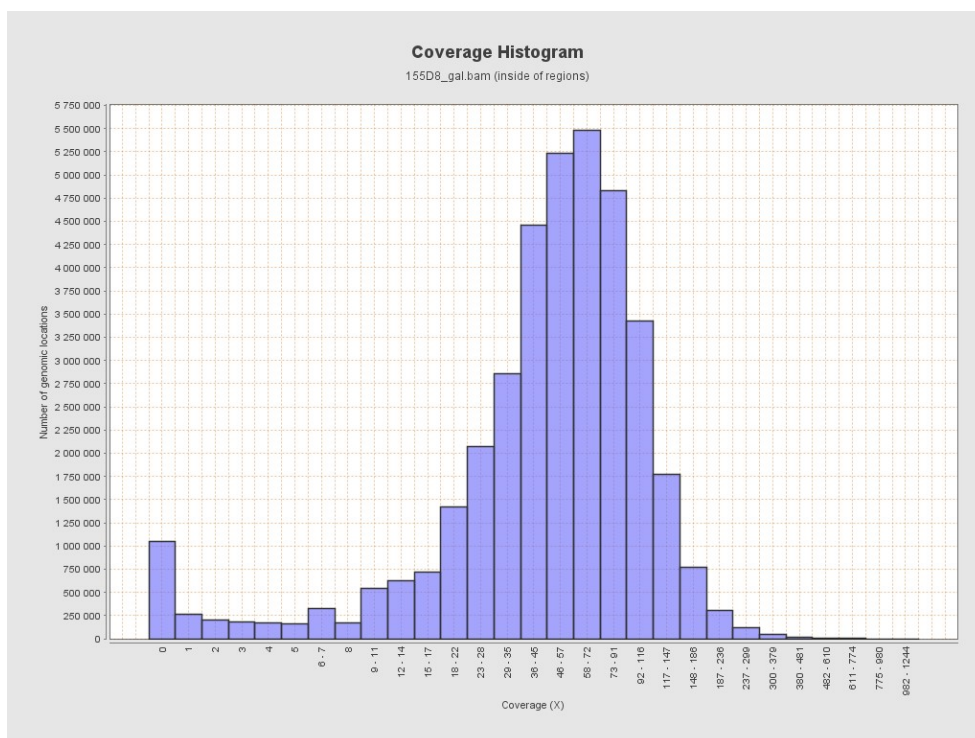

## Coverage Histogram (0-50X)

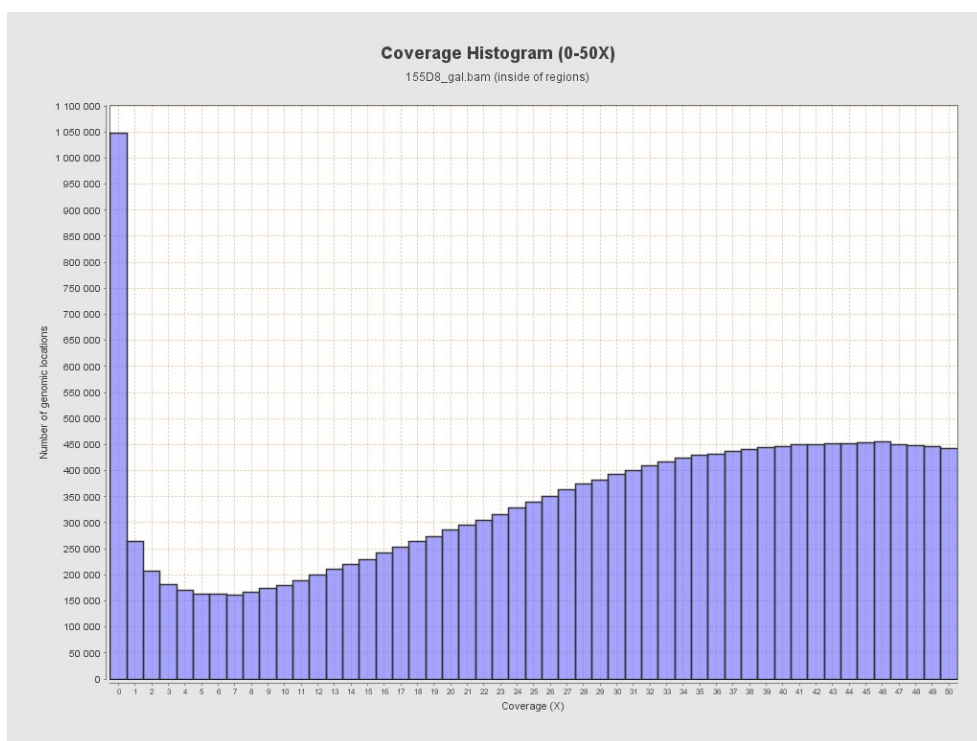

## Genome Fraction Coverage

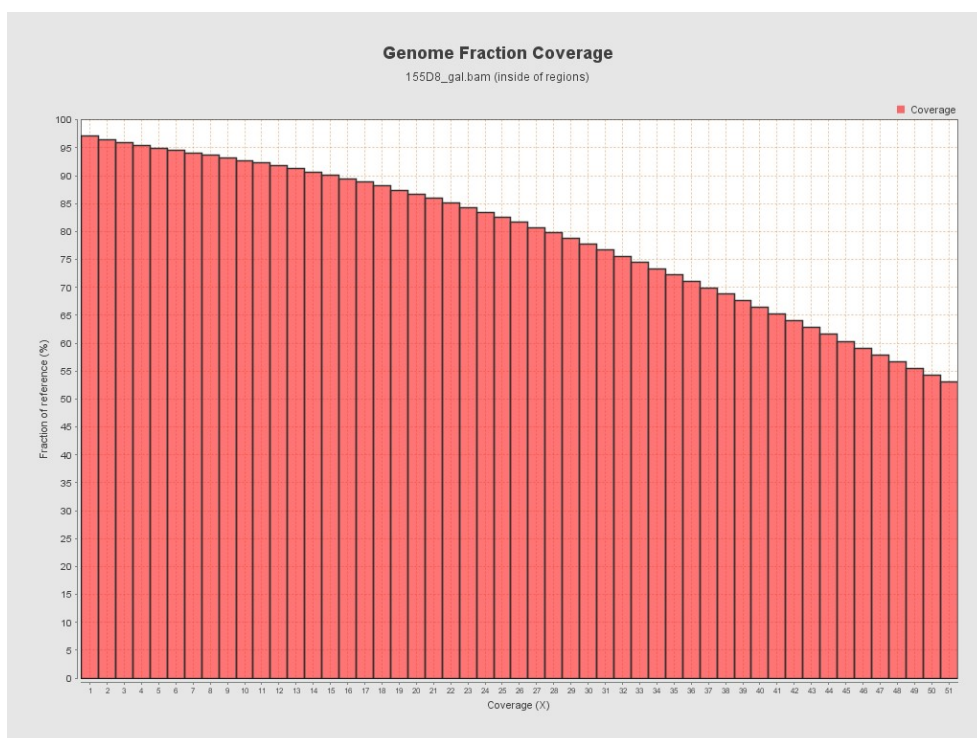

## Duplication Rate Histogram

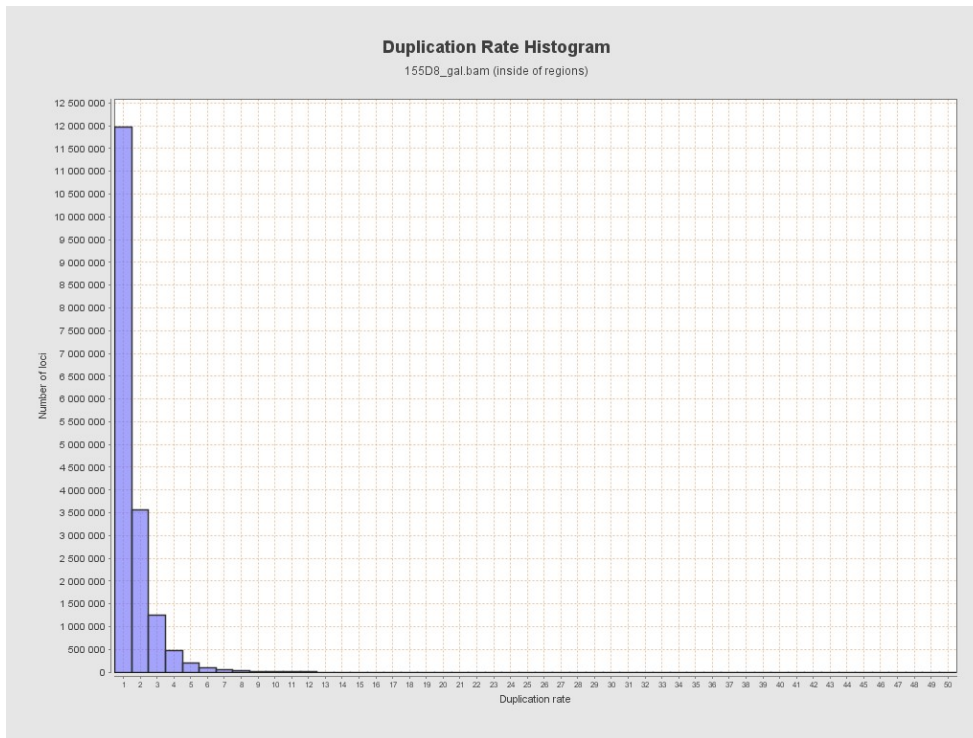

## Mapped Reads Nucleotide Content

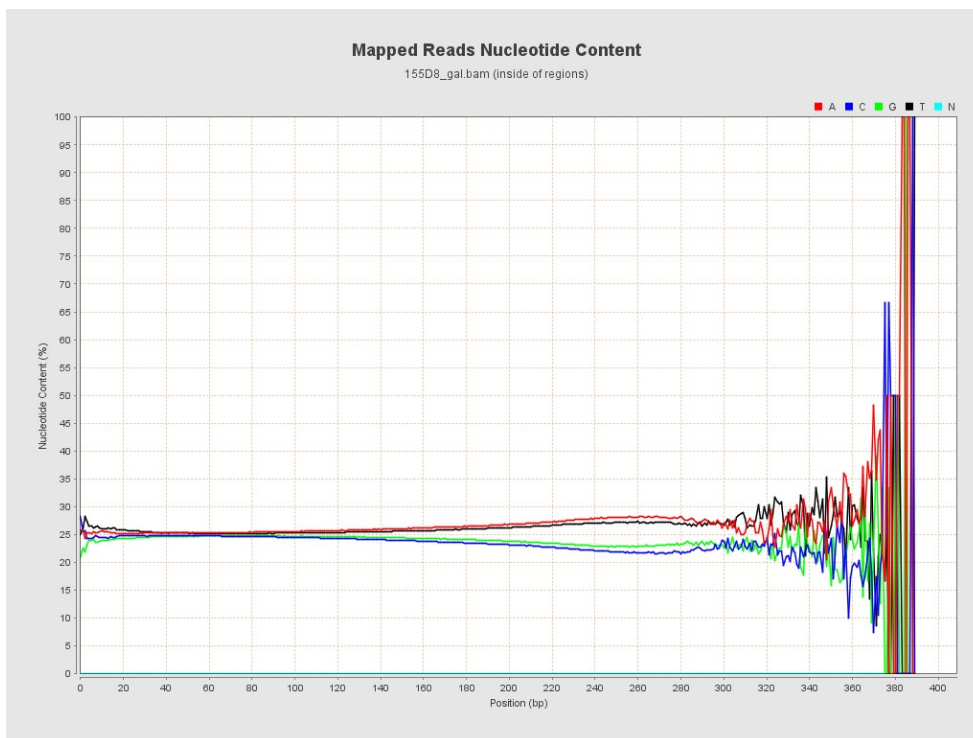

## Mapped Reads GC-content Distribution

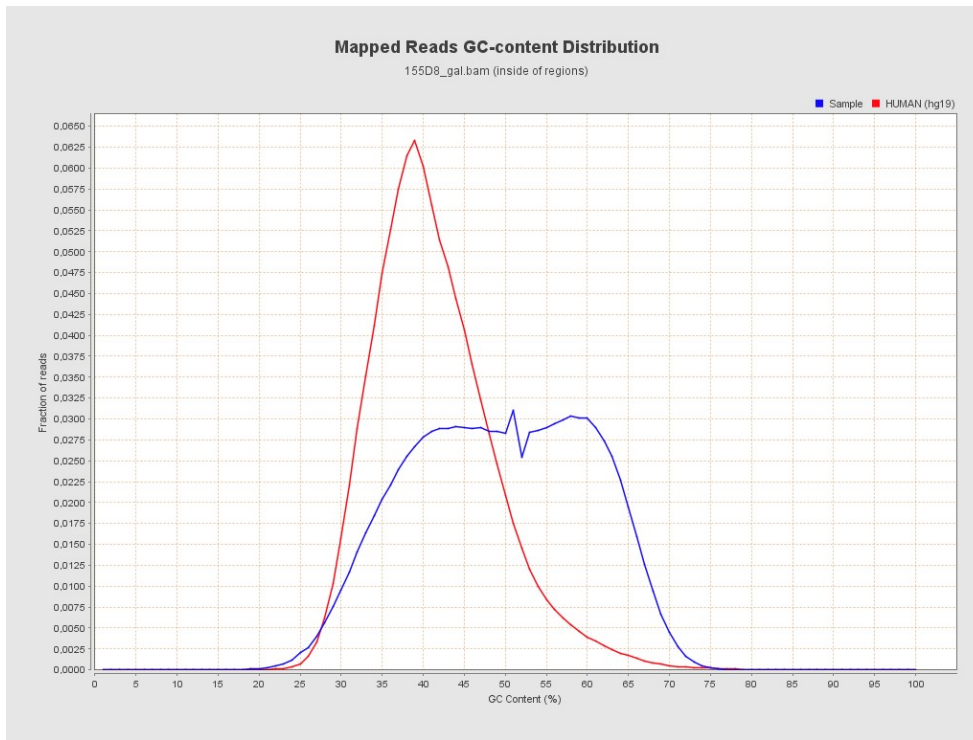

## Mapped Reads Clipping Profile

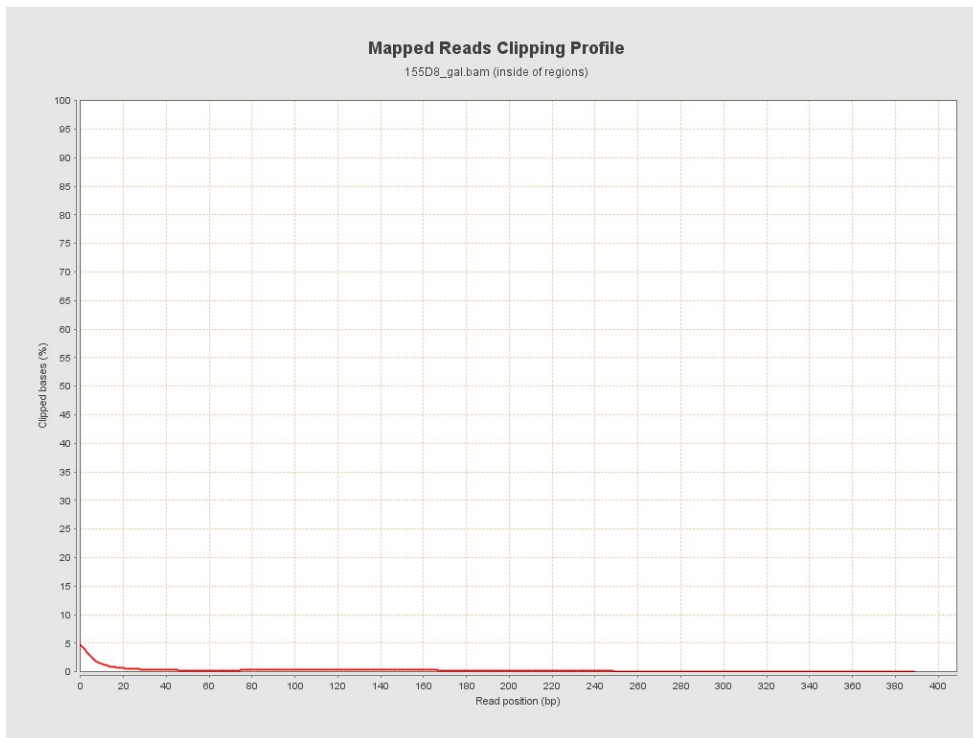

## Homopolymer Indels



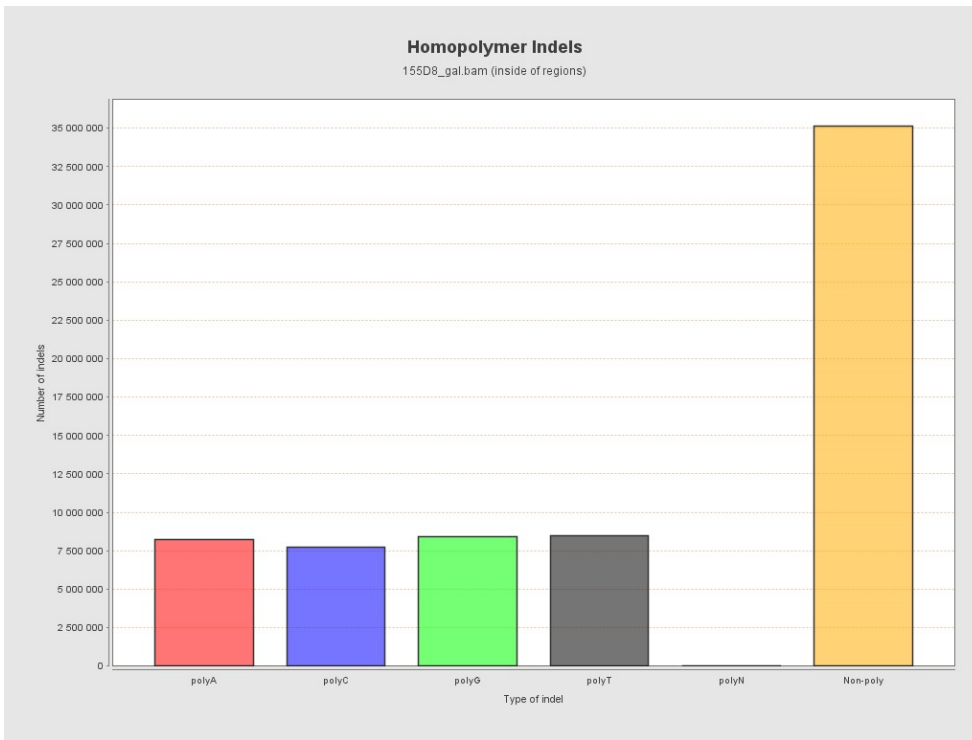

## Mapping Quality Across Reference

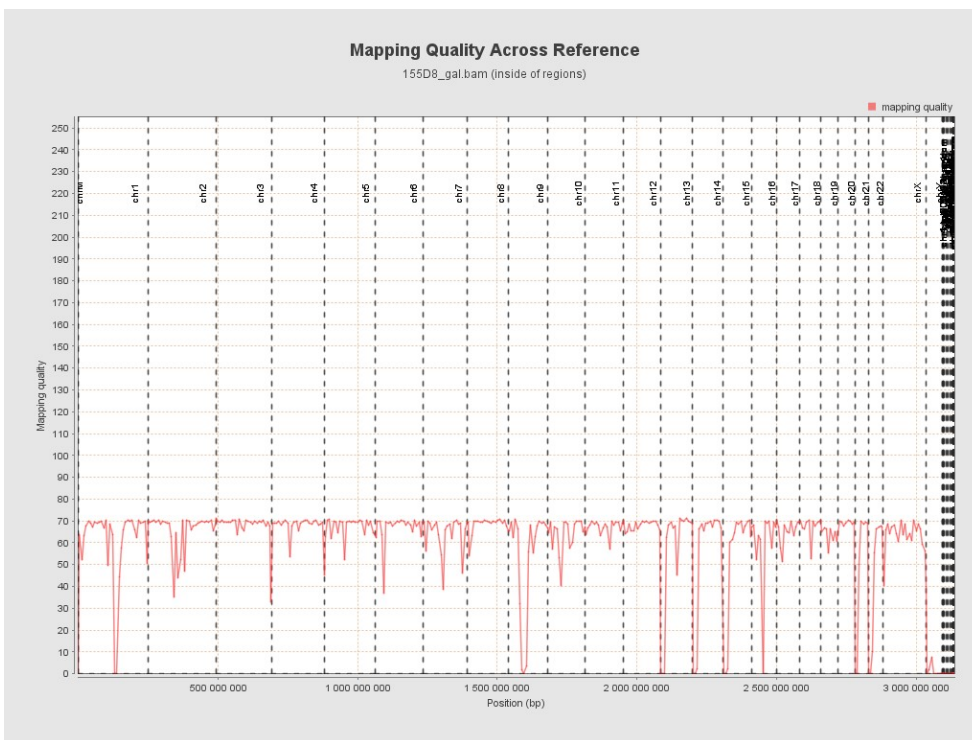

## Mapping Quality Histogram

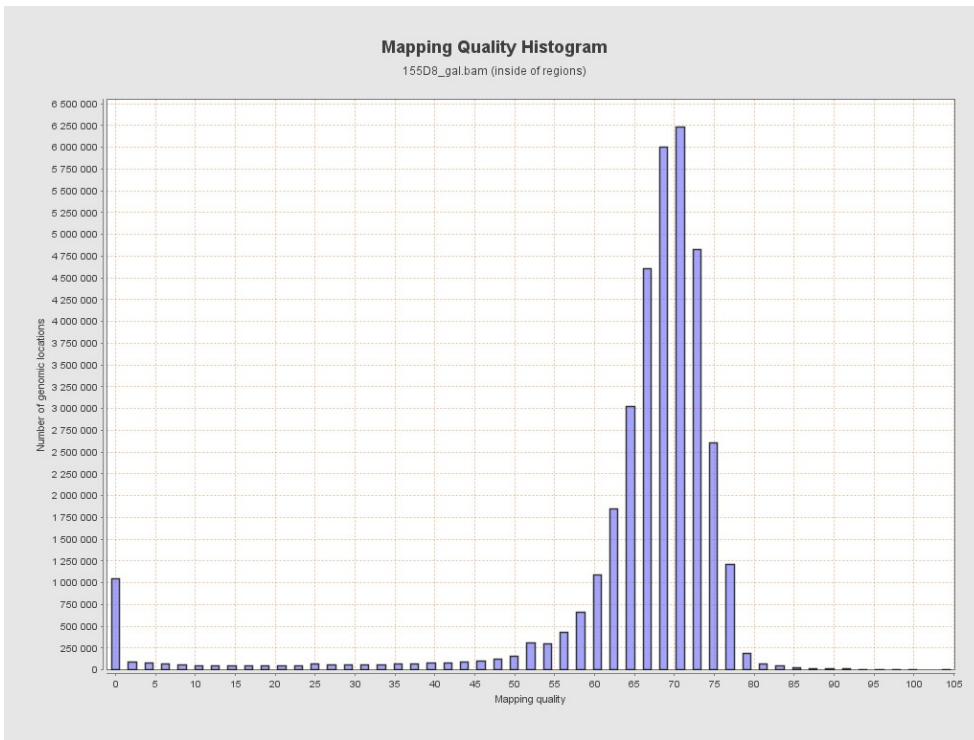

2016/11/08 09:38:29

Generated by QualiMap v.2.2.1

# Qualimap Report: First tumour alignment quality metrics QualiMap

## Input data and parameters

### QualiMap command line

```
qualimap bamqc -bam E:\NGS\Adenomas\Recidivs_5_31_155D8\HA05_gal.bam -gff E:\NGS\Exome_hg19_6fields.bed -os -c -nw 400 -hm 3
```

### Alignment

|                                       |                                                                                                                         |
|---------------------------------------|-------------------------------------------------------------------------------------------------------------------------|
| Command line:                         | mapall -f ucsc.hg19.fasta -r HA05.fastq<br>-i fastq -s HA05.bam -o 1 stage1 map1<br>stage2 map2 stage3 map3 stage4 map4 |
| Draw chromosome limits:               | yes                                                                                                                     |
| Analyze overlapping paired-end reads: | no                                                                                                                      |
| Program:                              | tmap (3.4.1)                                                                                                            |
| Analysis date:                        | Tue Nov 08 10:40:21 EET 2016                                                                                            |
| Size of a homopolymer:                | 3                                                                                                                       |
| Skip duplicate alignments:            | no                                                                                                                      |
| Number of windows:                    | 400                                                                                                                     |
| BAM file:                             | E:\NGS\Adenomas<br>\Recidivs_5_31_155D8\HA05_gal.bam                                                                    |

### GFF region

|                     |                               |
|---------------------|-------------------------------|
| Library protocol:   | non-strand-specific           |
| Outside statistics: | yes                           |
| GFF file:           | E:\NGS\Exome_hg19_6fields.bed |

## Summary

### Globals

|                          |                     |
|--------------------------|---------------------|
| Reference size           | 3 137 161 264       |
| Number of reads          | 73 384 342          |
| Mapped reads             | 71 615 114 / 97,59% |
| Unmapped reads           | 1 769 228 / 2,41%   |
| Mapped paired reads      | 0 / 0%              |
| Read min/max/mean length | 8 / 389 / 123,47    |
| Clipped reads            | 19 925 777 / 27,15% |

### Globals (inside of regions)

|                                      |                     |
|--------------------------------------|---------------------|
| Regions size/percentage of reference | 37 259 743 / 1,19%  |
| Mapped reads                         | 32 706 388 / 44,57% |
| Duplicated reads (estimated)         | 24 100 161 / 73,69% |

### CONTENTS

- [Input data & parameters](#)
- [Summary](#)
- [Coverage across reference](#)
- [Coverage Histogram](#)
- [Coverage Histogram \(0-50X\)](#)
- [Genome Fraction Coverage](#)
- [Duplication Rate Histogram](#)
- [Mapped Reads Nucleotide Content](#)
- [Mapped Reads GC-content Distribution](#)
- [Mapped Reads Clipping Profile](#)
- [Homopolymer Indels](#)
- [Mapping Quality Across Reference](#)
- [Mapping Quality Histogram](#)

|                  |        |
|------------------|--------|
| Duplication rate | 49,91% |
|------------------|--------|

### ACGT Content (inside of regions)

|                          |                      |
|--------------------------|----------------------|
| Number/percentage of A's | 581 726 650 / 22,15% |
| Number/percentage of C's | 738 620 227 / 28,13% |
| Number/percentage of T's | 568 923 934 / 21,67% |
| Number/percentage of G's | 736 703 364 / 28,05% |
| Number/percentage of N's | 0 / 0%               |
| GC Percentage            | 56,18%               |

### Coverage (inside of regions)

|                    |          |
|--------------------|----------|
| Mean               | 70,8506  |
| Standard Deviation | 210,7058 |

### Mapping Quality (inside of regions)

|                      |       |
|----------------------|-------|
| Mean Mapping Quality | 62,76 |
|----------------------|-------|

### Mismatches and indels (inside of regions)

|                                          |            |
|------------------------------------------|------------|
| General error rate                       | 4,73%      |
| Mismatches                               | 80 237 006 |
| Insertions                               | 27 628 707 |
| Mapped reads with at least one insertion | 20,81%     |
| Deletions                                | 17 716 669 |
| Mapped reads with at least one deletion  | 16,39%     |
| Homopolymer indels                       | 45,07%     |

### Chromosome stats (inside of regions)

| Name  | Length  | Mapped bases | Mean coverage | Standard deviation |
|-------|---------|--------------|---------------|--------------------|
| chrM  | 0       | 0            | 0             | 0                  |
| chr1  | 3784540 | 276715387    | 73,1173       | 133,8306           |
| chr2  | 2784129 | 146072489    | 52,4661       | 89,5221            |
| chr3  | 2096186 | 124687064    | 59,4828       | 93,5154            |
| chr4  | 1419494 | 55259747     | 38,9292       | 89,7465            |
| chr5  | 1707093 | 90167943     | 52,8196       | 98,0709            |
| chr6  | 1939714 | 90427204     | 46,6188       | 124,8433           |
| chr7  | 1715393 | 112835265    | 65,7781       | 111,9768           |
| chr8  | 1223260 | 69866447     | 57,115        | 104,0277           |
| chr9  | 1591797 | 116357951    | 73,0985       | 180,4604           |
| chr10 | 1501994 | 91844406     | 61,1483       | 92,8024            |
| chr11 | 2152291 | 164036700    | 76,2149       | 129,1423           |
| chr12 | 1910362 | 124748953    | 65,3012       | 167,5877           |

|                       |         |           |          |          |
|-----------------------|---------|-----------|----------|----------|
| chr13                 | 706110  | 30614066  | 43,3559  | 84,492   |
| chr14                 | 1194533 | 82319157  | 68,9133  | 126,6364 |
| chr15                 | 1229578 | 81276655  | 66,1013  | 130,2296 |
| chr16                 | 1502270 | 140286395 | 93,3829  | 204,9517 |
| chr17                 | 2108732 | 184216850 | 87,3591  | 140,9159 |
| chr18                 | 566305  | 26803663  | 47,3308  | 90,0536  |
| chr19                 | 2381241 | 235833614 | 99,0381  | 379,24   |
| chr20                 | 922966  | 73815861  | 79,9768  | 114,0044 |
| chr21                 | 401819  | 31693229  | 78,8744  | 169,478  |
| chr22                 | 836825  | 81926950  | 97,9021  | 160,531  |
| chrX                  | 1493772 | 205745267 | 137,7354 | 703,6147 |
| chrY                  | 89339   | 2323996   | 26,0132  | 74,1616  |
| chr1_gl000191_random  | 0       | 0         | 0        | 0        |
| chr1_gl000192_random  | 0       | 0         | 0        | 0        |
| chr4_ctg9_hap1        | 0       | 0         | 0        | 0        |
| chr4_gl000193_random  | 0       | 0         | 0        | 0        |
| chr4_gl000194_random  | 0       | 0         | 0        | 0        |
| chr6_apd_hap1         | 0       | 0         | 0        | 0        |
| chr6_cox_hap2         | 0       | 0         | 0        | 0        |
| chr6_dbb_hap3         | 0       | 0         | 0        | 0        |
| chr6_mann_hap4        | 0       | 0         | 0        | 0        |
| chr6_mcf_hap5         | 0       | 0         | 0        | 0        |
| chr6_qbl_hap6         | 0       | 0         | 0        | 0        |
| chr6_ssto_hap7        | 0       | 0         | 0        | 0        |
| chr7_gl000195_random  | 0       | 0         | 0        | 0        |
| chr8_gl000196_random  | 0       | 0         | 0        | 0        |
| chr8_gl000197_random  | 0       | 0         | 0        | 0        |
| chr9_gl000198_random  | 0       | 0         | 0        | 0        |
| chr9_gl000199_random  | 0       | 0         | 0        | 0        |
| chr9_gl000200_random  | 0       | 0         | 0        | 0        |
| chr9_gl000201_random  | 0       | 0         | 0        | 0        |
| chr11_gl000202_random | 0       | 0         | 0        | 0        |
| chr17_ctg5_hap1       | 0       | 0         | 0        | 0        |
| chr17_gl000203_random | 0       | 0         | 0        | 0        |
| chr17_gl000204_random | 0       | 0         | 0        | 0        |
| chr17_gl000205_random | 0       | 0         | 0        | 0        |
| chr17_gl000206_random | 0       | 0         | 0        | 0        |
| chr18_gl000207_random | 0       | 0         | 0        | 0        |

|                       |   |   |   |   |
|-----------------------|---|---|---|---|
| chr19_gl000208_random | 0 | 0 | 0 | 0 |
| chr19_gl000209_random | 0 | 0 | 0 | 0 |
| chr21_gl000210_random | 0 | 0 | 0 | 0 |
| chrUn_gl000211        | 0 | 0 | 0 | 0 |
| chrUn_gl000212        | 0 | 0 | 0 | 0 |
| chrUn_gl000213        | 0 | 0 | 0 | 0 |
| chrUn_gl000214        | 0 | 0 | 0 | 0 |
| chrUn_gl000215        | 0 | 0 | 0 | 0 |
| chrUn_gl000216        | 0 | 0 | 0 | 0 |
| chrUn_gl000217        | 0 | 0 | 0 | 0 |
| chrUn_gl000218        | 0 | 0 | 0 | 0 |
| chrUn_gl000219        | 0 | 0 | 0 | 0 |
| chrUn_gl000220        | 0 | 0 | 0 | 0 |
| chrUn_gl000221        | 0 | 0 | 0 | 0 |
| chrUn_gl000222        | 0 | 0 | 0 | 0 |
| chrUn_gl000223        | 0 | 0 | 0 | 0 |
| chrUn_gl000224        | 0 | 0 | 0 | 0 |
| chrUn_gl000225        | 0 | 0 | 0 | 0 |
| chrUn_gl000226        | 0 | 0 | 0 | 0 |
| chrUn_gl000227        | 0 | 0 | 0 | 0 |
| chrUn_gl000228        | 0 | 0 | 0 | 0 |
| chrUn_gl000229        | 0 | 0 | 0 | 0 |
| chrUn_gl000230        | 0 | 0 | 0 | 0 |
| chrUn_gl000231        | 0 | 0 | 0 | 0 |
| chrUn_gl000232        | 0 | 0 | 0 | 0 |
| chrUn_gl000233        | 0 | 0 | 0 | 0 |
| chrUn_gl000234        | 0 | 0 | 0 | 0 |
| chrUn_gl000235        | 0 | 0 | 0 | 0 |
| chrUn_gl000236        | 0 | 0 | 0 | 0 |
| chrUn_gl000237        | 0 | 0 | 0 | 0 |
| chrUn_gl000238        | 0 | 0 | 0 | 0 |
| chrUn_gl000239        | 0 | 0 | 0 | 0 |
| chrUn_gl000240        | 0 | 0 | 0 | 0 |
| chrUn_gl000241        | 0 | 0 | 0 | 0 |
| chrUn_gl000242        | 0 | 0 | 0 | 0 |
| chrUn_gl000243        | 0 | 0 | 0 | 0 |
| chrUn_gl000244        | 0 | 0 | 0 | 0 |
| chrUn_gl000245        | 0 | 0 | 0 | 0 |

|                |   |   |   |   |
|----------------|---|---|---|---|
| chrUn_gl000246 | 0 | 0 | 0 | 0 |
| chrUn_gl000247 | 0 | 0 | 0 | 0 |
| chrUn_gl000248 | 0 | 0 | 0 | 0 |
| chrUn_gl000249 | 0 | 0 | 0 | 0 |

## Coverage across reference

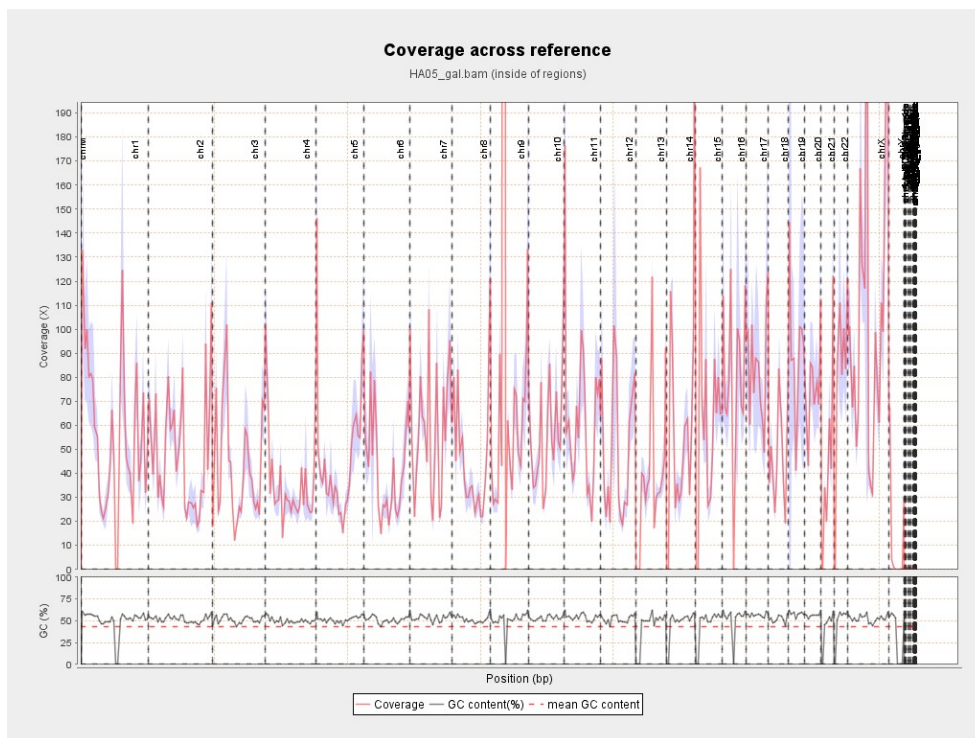

## Coverage Histogram

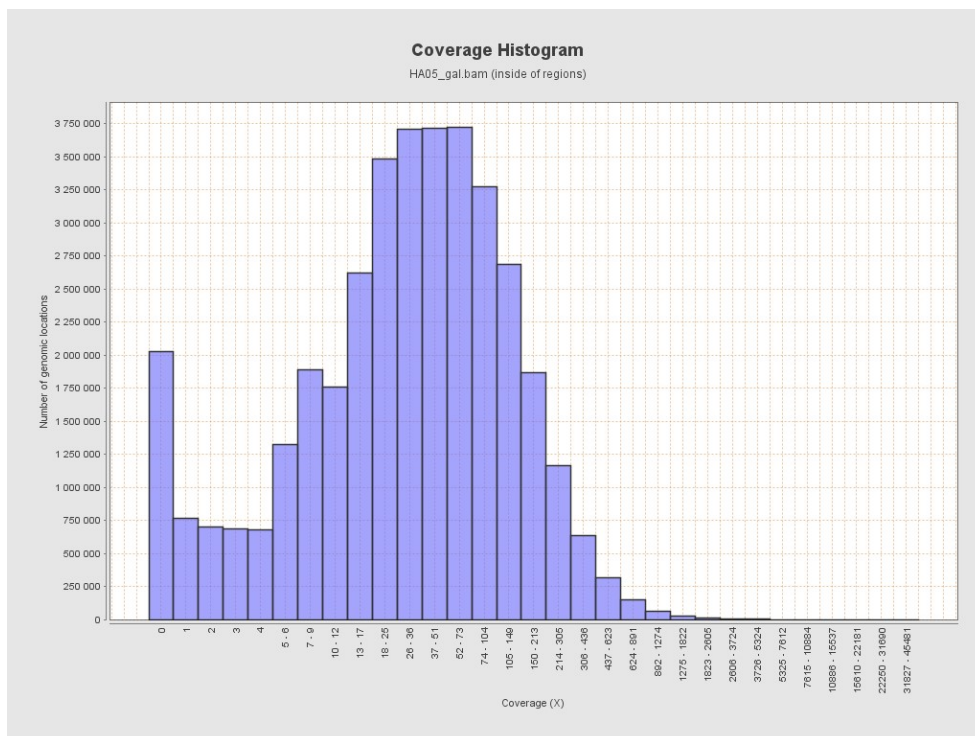

## Coverage Histogram (0-50X)

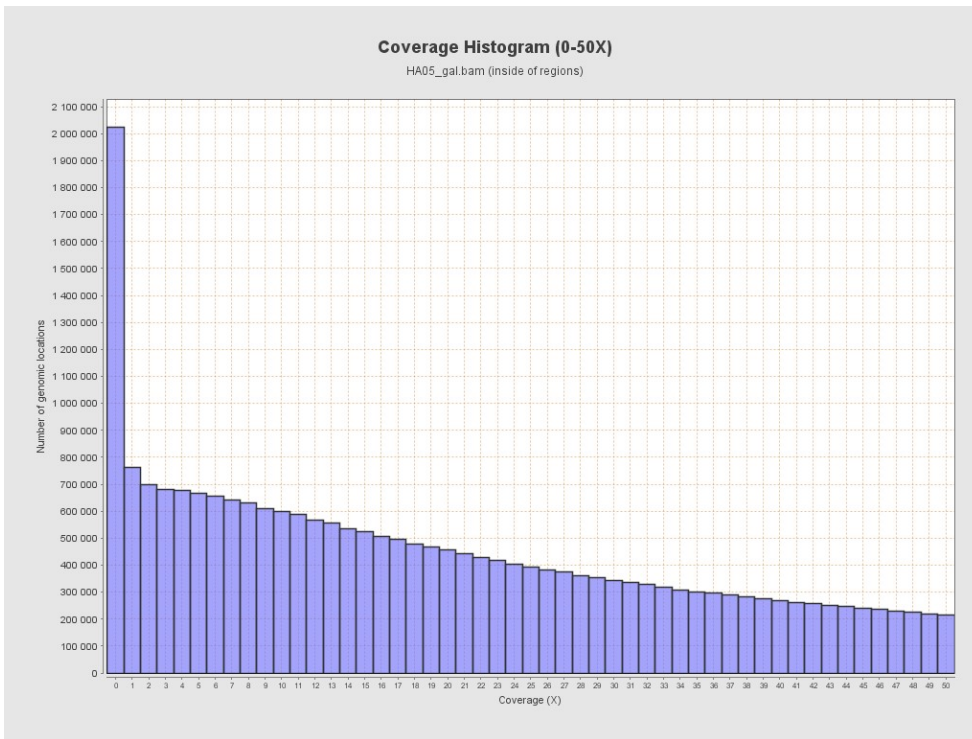

## Genome Fraction Coverage

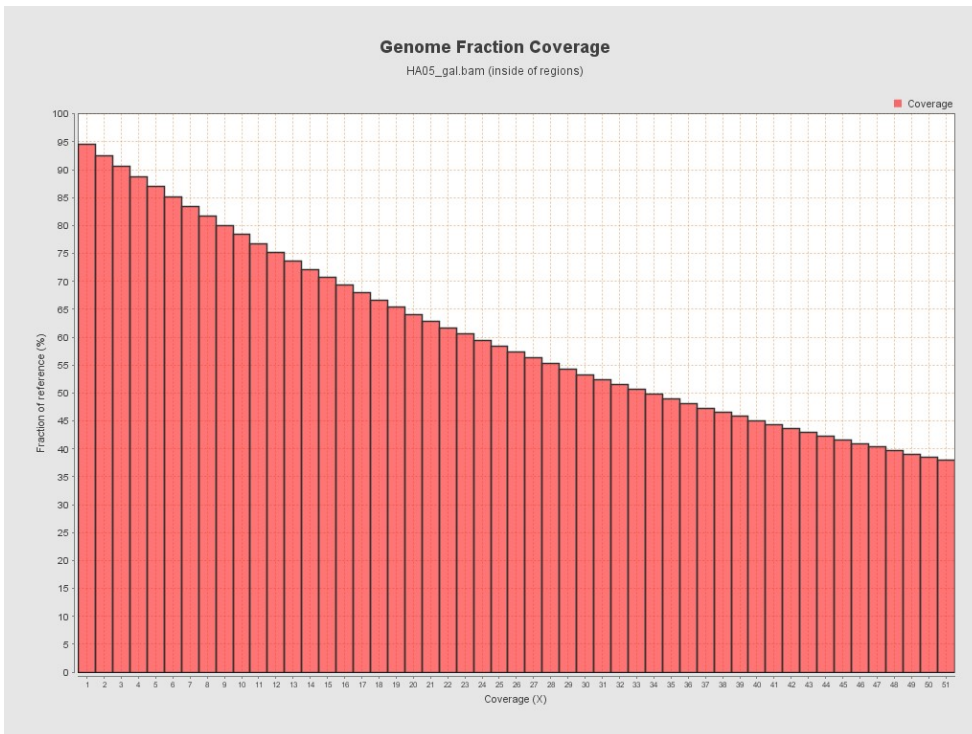

## Duplication Rate Histogram



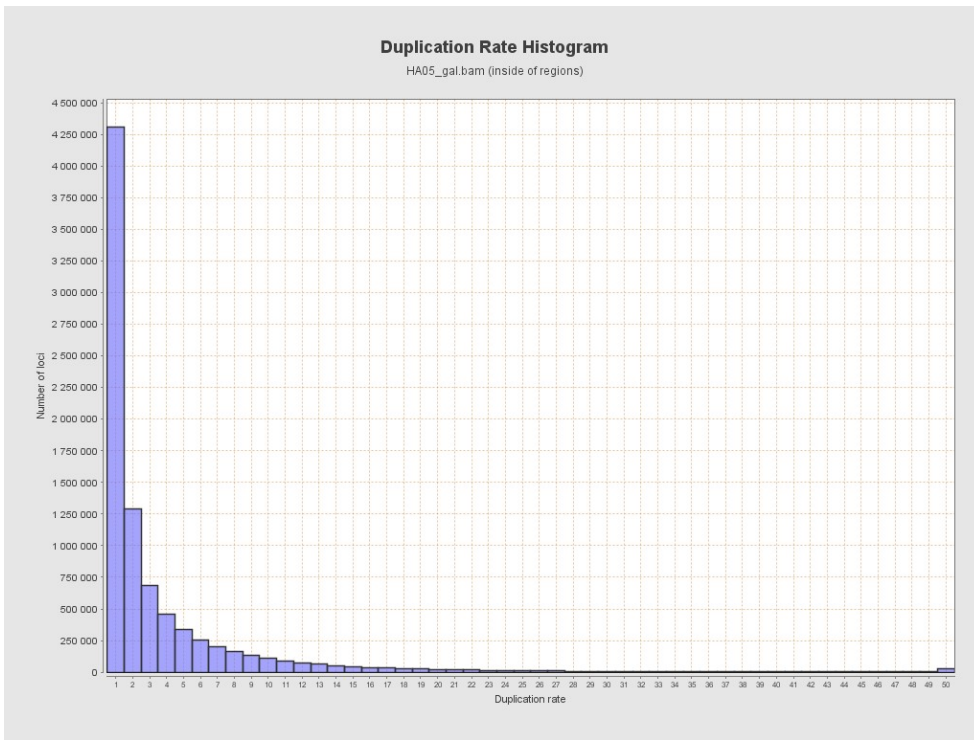

## Mapped Reads Nucleotide Content

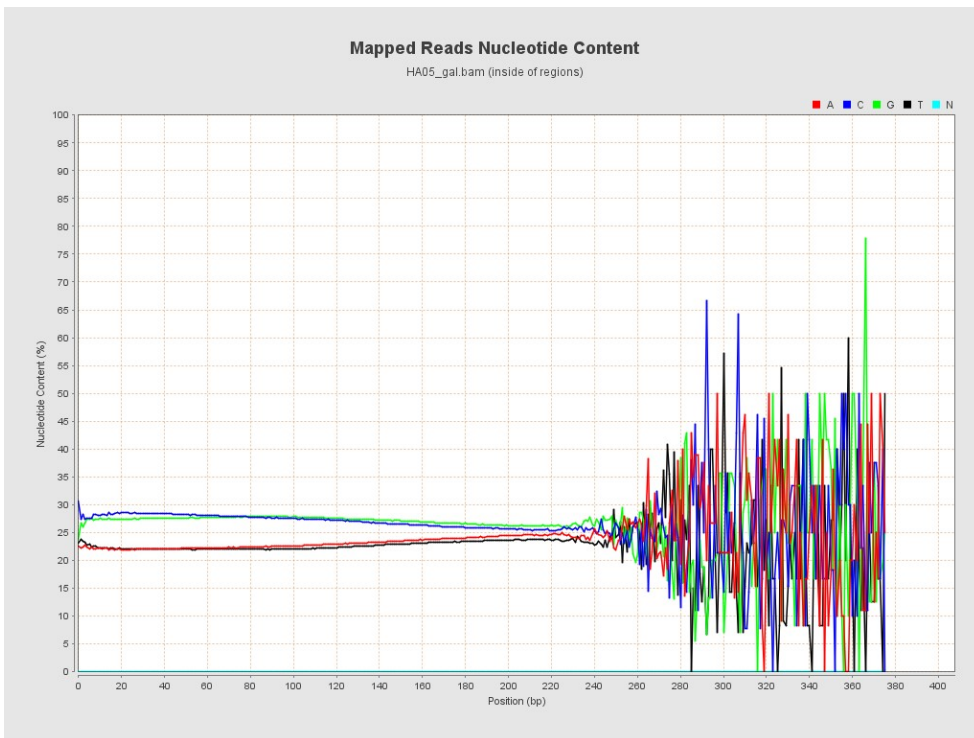

## Mapped Reads GC-content Distribution

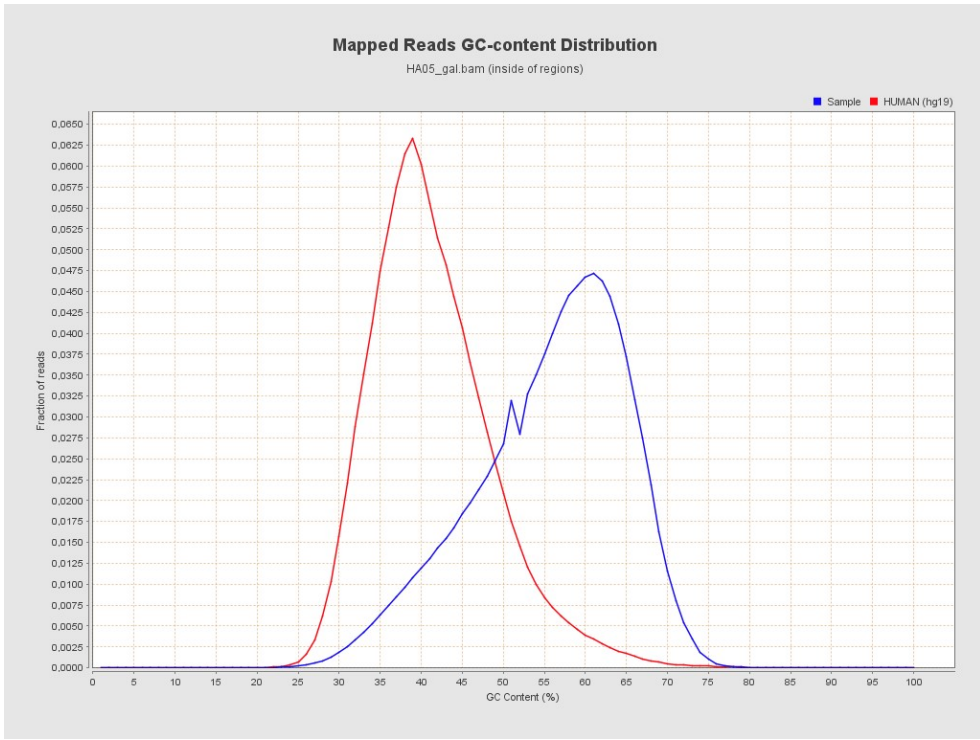

## Mapped Reads Clipping Profile

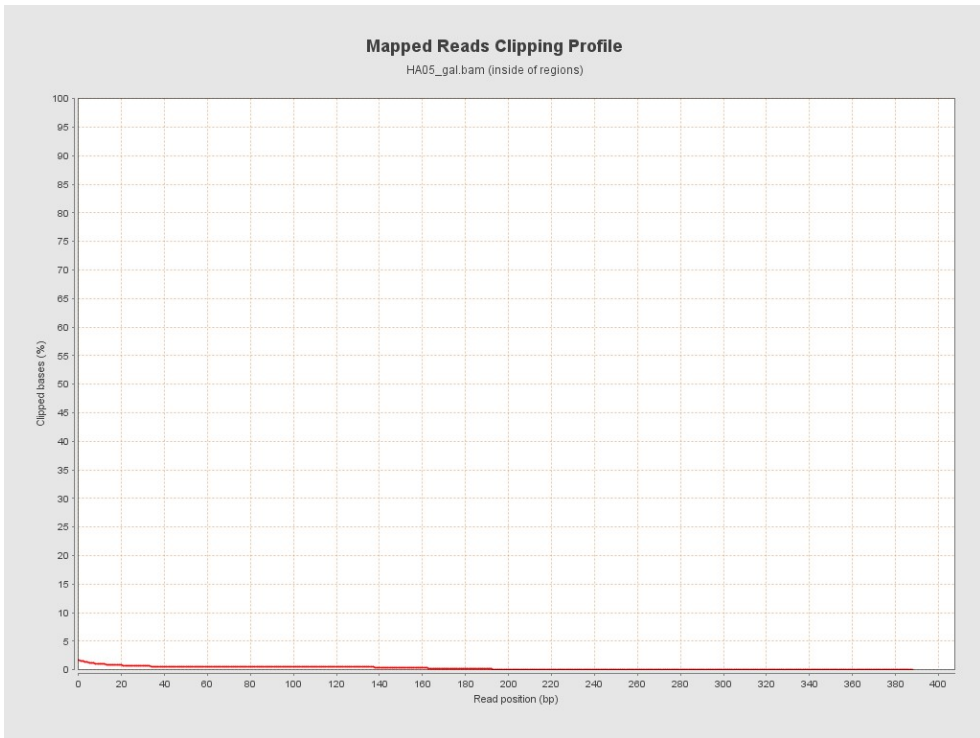

## Homopolymer Indels

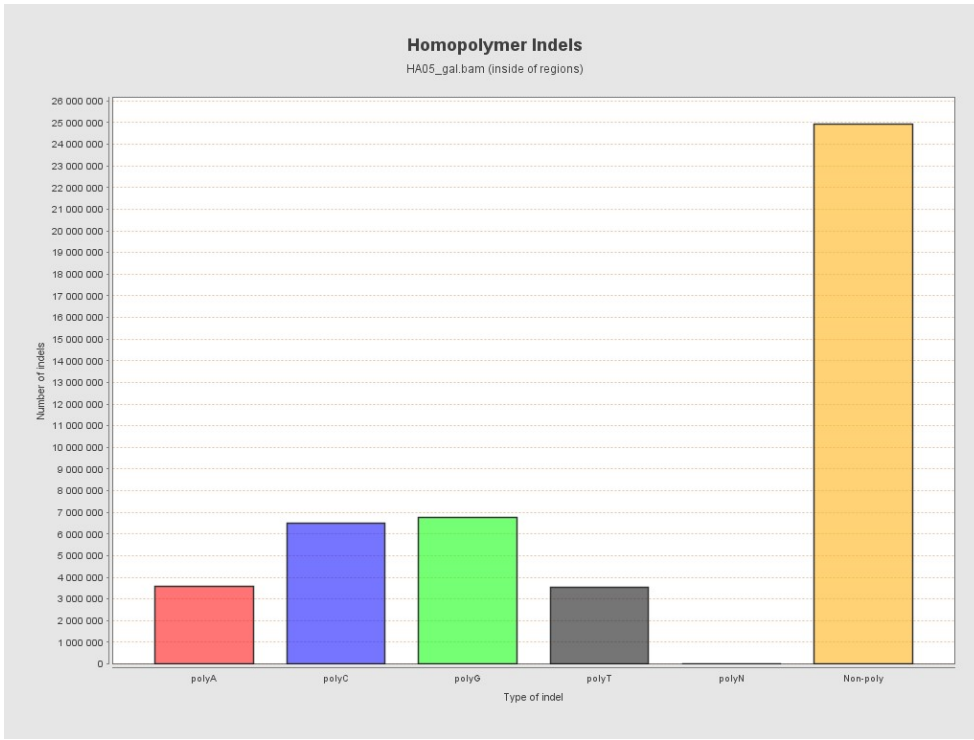

## Mapping Quality Across Reference

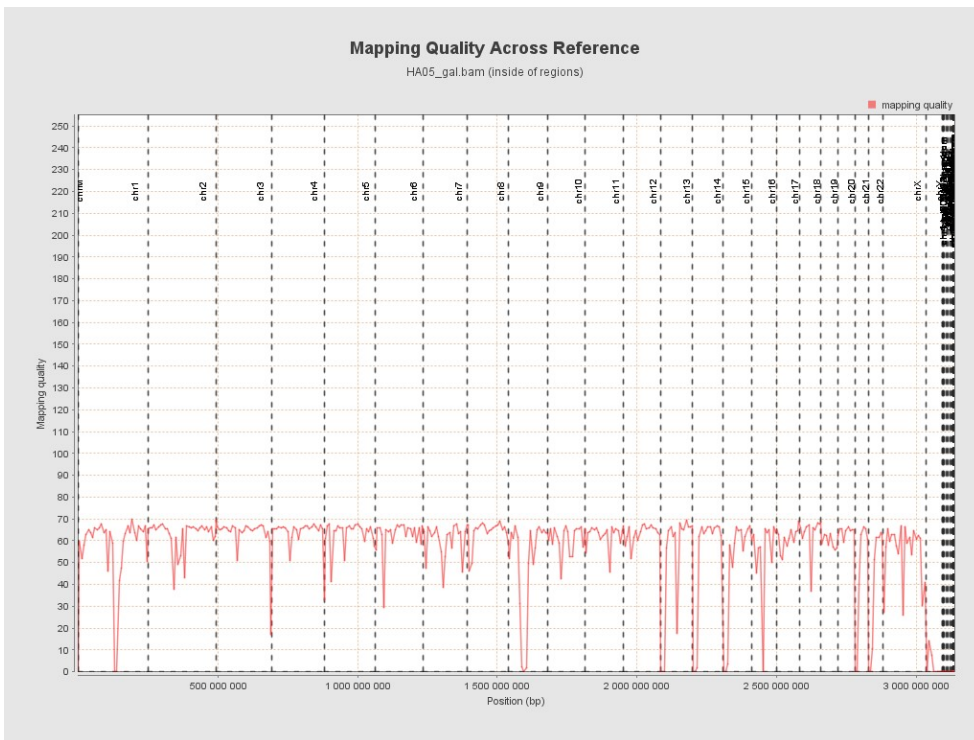

## Mapping Quality Histogram

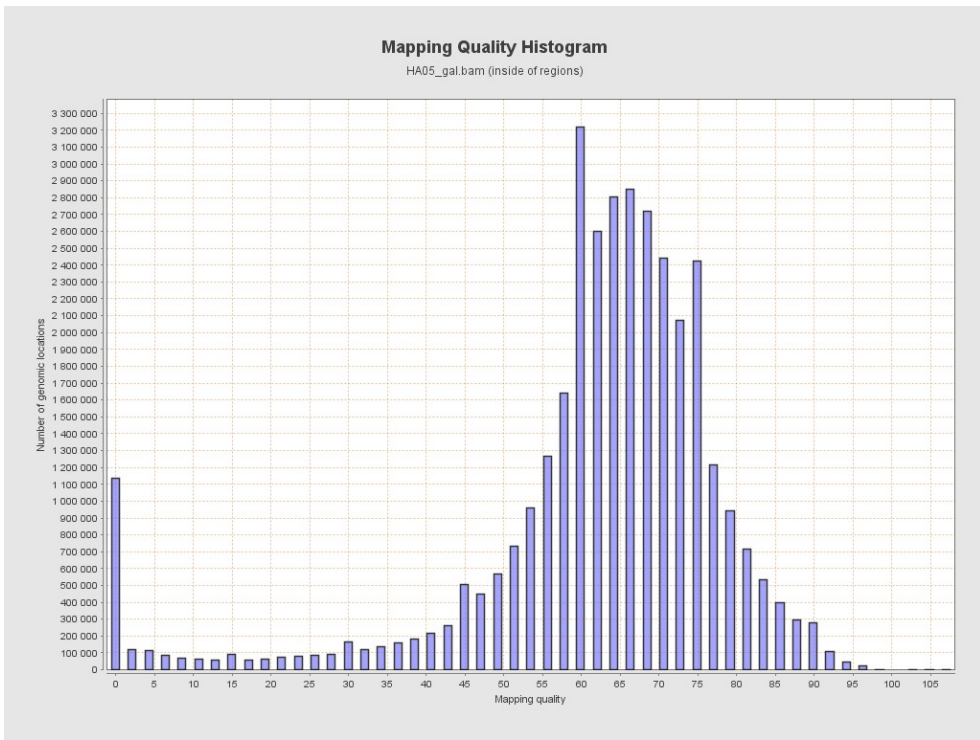

2016/11/08 12:45:05

Generated by QualiMap v.2.2.1

# Qualimap Report: **Second tumour DNA alignment quality metrics** **ap**

## Input data and parameters

### QualiMap command line

```
qualimap bamqc -bam E:\NGS\Adenomas\Recidivs_5_31_155D8\HA31_gal.bam -gff E:\NGS\Exome_hg19_6fields.bed -os -c -nw 400 -hm 3
```

### Alignment

|                                       |                                                                                                                   |
|---------------------------------------|-------------------------------------------------------------------------------------------------------------------|
| Command line:                         | mapall -f ucsc.hg19.fasta -r HA31.fastq -i fastq -s HA31.bam -o 1 stage1 map1 stage2 map2 stage3 map3 stage4 map4 |
| Draw chromosome limits:               | yes                                                                                                               |
| Analyze overlapping paired-end reads: | no                                                                                                                |
| Program:                              | tmap (3.4.1)                                                                                                      |
| Analysis date:                        | Tue Nov 08 09:59:32 EET 2016                                                                                      |
| Size of a homopolymer:                | 3                                                                                                                 |
| Skip duplicate alignments:            | no                                                                                                                |
| Number of windows:                    | 400                                                                                                               |
| BAM file:                             | E:\NGS\Adenomas\Recidivs_5_31_155D8\HA31_gal.bam                                                                  |

### GFF region

|                     |                               |
|---------------------|-------------------------------|
| Library protocol:   | non-strand-specific           |
| Outside statistics: | yes                           |
| GFF file:           | E:\NGS\Exome_hg19_6fields.bed |

## Summary

### Globals

|                          |                     |
|--------------------------|---------------------|
| Reference size           | 3 137 161 264       |
| Number of reads          | 90 113 032          |
| Mapped reads             | 87 751 327 / 97,38% |
| Unmapped reads           | 2 361 705 / 2,62%   |
| Mapped paired reads      | 0 / 0%              |
| Read min/max/mean length | 8 / 388 / 123,36    |
| Clipped reads            | 23 325 266 / 25,88% |

### Globals (inside of regions)

|                                      |                     |
|--------------------------------------|---------------------|
| Regions size/percentage of reference | 37 259 743 / 1,19%  |
| Mapped reads                         | 38 664 636 / 42,91% |
| Duplicated reads (estimated)         | 25 157 057 / 65,06% |

## CONTENTS

- [Input data & parameters](#)
- [Summary](#)
- [Coverage across reference](#)
- [Coverage Histogram](#)
- [Coverage Histogram \(0-50X\)](#)
- [Genome Fraction Coverage](#)
- [Duplication Rate Histogram](#)
- [Mapped Reads Nucleotide Content](#)
- [Mapped Reads GC-content Distribution](#)
- [Mapped Reads Clipping Profile](#)
- [Homopolymer Indels](#)
- [Mapping Quality Across Reference](#)
- [Mapping Quality Histogram](#)

|                  |        |
|------------------|--------|
| Duplication rate | 50,48% |
|------------------|--------|

### ACGT Content (inside of regions)

|                          |                      |
|--------------------------|----------------------|
| Number/percentage of A's | 713 283 702 / 22,68% |
| Number/percentage of C's | 865 579 777 / 27,53% |
| Number/percentage of T's | 699 162 525 / 22,24% |
| Number/percentage of G's | 866 304 823 / 27,55% |
| Number/percentage of N's | 0 / 0%               |
| GC Percentage            | 55,08%               |

### Coverage (inside of regions)

|                    |          |
|--------------------|----------|
| Mean               | 84,8354  |
| Standard Deviation | 273,9178 |

### Mapping Quality (inside of regions)

|                      |    |
|----------------------|----|
| Mean Mapping Quality | 64 |
|----------------------|----|

### Mismatches and indels (inside of regions)

|                                          |            |
|------------------------------------------|------------|
| General error rate                       | 4,44%      |
| Mismatches                               | 89 257 377 |
| Insertions                               | 33 263 461 |
| Mapped reads with at least one insertion | 20,19%     |
| Deletions                                | 21 418 865 |
| Mapped reads with at least one deletion  | 16,08%     |
| Homopolymer indels                       | 45,2%      |

### Chromosome stats (inside of regions)

| Name  | Length  | Mapped bases | Mean coverage | Standard deviation |
|-------|---------|--------------|---------------|--------------------|
| chrM  | 0       | 0            | 0             | 0                  |
| chr1  | 3784540 | 329356270    | 87,0268       | 167,8278           |
| chr2  | 2784129 | 178708878    | 64,1884       | 102,2274           |
| chr3  | 2096186 | 149504515    | 71,3222       | 104,9439           |
| chr4  | 1419494 | 72217121     | 50,8753       | 106,7254           |
| chr5  | 1707093 | 111212663    | 65,1474       | 116,956            |
| chr6  | 1939714 | 118480442    | 61,0814       | 217,8677           |
| chr7  | 1715393 | 133907003    | 78,062        | 129,7076           |
| chr8  | 1223260 | 83567326     | 68,3153       | 113,2658           |
| chr9  | 1591797 | 139748348    | 87,7928       | 325,4959           |
| chr10 | 1501994 | 109990653    | 73,2298       | 97,3256            |
| chr11 | 2152291 | 196884234    | 91,4766       | 171,6482           |
| chr12 | 1910362 | 152223482    | 79,6831       | 234,9356           |

|                       |         |           |          |          |
|-----------------------|---------|-----------|----------|----------|
| chr13                 | 706110  | 39099101  | 55,3725  | 99,926   |
| chr14                 | 1194533 | 100402338 | 84,0515  | 149,8884 |
| chr15                 | 1229578 | 96823102  | 78,745   | 174,2551 |
| chr16                 | 1502270 | 161393152 | 107,4329 | 261,6091 |
| chr17                 | 2108732 | 211280718 | 100,1933 | 160,5545 |
| chr18                 | 566305  | 33163852  | 58,5618  | 92,8592  |
| chr19                 | 2381241 | 278679429 | 117,0312 | 491,7239 |
| chr20                 | 922966  | 83895987  | 90,8982  | 119,664  |
| chr21                 | 401819  | 40641785  | 101,1445 | 357,9042 |
| chr22                 | 836825  | 93564831  | 111,8093 | 222,8602 |
| chrX                  | 1493772 | 243391489 | 162,9375 | 885,9261 |
| chrY                  | 89339   | 2809730   | 31,4502  | 97,8118  |
| chr1_gl000191_random  | 0       | 0         | 0        | 0        |
| chr1_gl000192_random  | 0       | 0         | 0        | 0        |
| chr4_ctg9_hap1        | 0       | 0         | 0        | 0        |
| chr4_gl000193_random  | 0       | 0         | 0        | 0        |
| chr4_gl000194_random  | 0       | 0         | 0        | 0        |
| chr6_apd_hap1         | 0       | 0         | 0        | 0        |
| chr6_cox_hap2         | 0       | 0         | 0        | 0        |
| chr6_dbb_hap3         | 0       | 0         | 0        | 0        |
| chr6_mann_hap4        | 0       | 0         | 0        | 0        |
| chr6_mcf_hap5         | 0       | 0         | 0        | 0        |
| chr6_qbl_hap6         | 0       | 0         | 0        | 0        |
| chr6_ssto_hap7        | 0       | 0         | 0        | 0        |
| chr7_gl000195_random  | 0       | 0         | 0        | 0        |
| chr8_gl000196_random  | 0       | 0         | 0        | 0        |
| chr8_gl000197_random  | 0       | 0         | 0        | 0        |
| chr9_gl000198_random  | 0       | 0         | 0        | 0        |
| chr9_gl000199_random  | 0       | 0         | 0        | 0        |
| chr9_gl000200_random  | 0       | 0         | 0        | 0        |
| chr9_gl000201_random  | 0       | 0         | 0        | 0        |
| chr11_gl000202_random | 0       | 0         | 0        | 0        |
| chr17_ctg5_hap1       | 0       | 0         | 0        | 0        |
| chr17_gl000203_random | 0       | 0         | 0        | 0        |
| chr17_gl000204_random | 0       | 0         | 0        | 0        |
| chr17_gl000205_random | 0       | 0         | 0        | 0        |
| chr17_gl000206_random | 0       | 0         | 0        | 0        |
| chr18_gl000207_random | 0       | 0         | 0        | 0        |

|                       |   |   |   |   |
|-----------------------|---|---|---|---|
| chr19_gl000208_random | 0 | 0 | 0 | 0 |
| chr19_gl000209_random | 0 | 0 | 0 | 0 |
| chr21_gl000210_random | 0 | 0 | 0 | 0 |
| chrUn_gl000211        | 0 | 0 | 0 | 0 |
| chrUn_gl000212        | 0 | 0 | 0 | 0 |
| chrUn_gl000213        | 0 | 0 | 0 | 0 |
| chrUn_gl000214        | 0 | 0 | 0 | 0 |
| chrUn_gl000215        | 0 | 0 | 0 | 0 |
| chrUn_gl000216        | 0 | 0 | 0 | 0 |
| chrUn_gl000217        | 0 | 0 | 0 | 0 |
| chrUn_gl000218        | 0 | 0 | 0 | 0 |
| chrUn_gl000219        | 0 | 0 | 0 | 0 |
| chrUn_gl000220        | 0 | 0 | 0 | 0 |
| chrUn_gl000221        | 0 | 0 | 0 | 0 |
| chrUn_gl000222        | 0 | 0 | 0 | 0 |
| chrUn_gl000223        | 0 | 0 | 0 | 0 |
| chrUn_gl000224        | 0 | 0 | 0 | 0 |
| chrUn_gl000225        | 0 | 0 | 0 | 0 |
| chrUn_gl000226        | 0 | 0 | 0 | 0 |
| chrUn_gl000227        | 0 | 0 | 0 | 0 |
| chrUn_gl000228        | 0 | 0 | 0 | 0 |
| chrUn_gl000229        | 0 | 0 | 0 | 0 |
| chrUn_gl000230        | 0 | 0 | 0 | 0 |
| chrUn_gl000231        | 0 | 0 | 0 | 0 |
| chrUn_gl000232        | 0 | 0 | 0 | 0 |
| chrUn_gl000233        | 0 | 0 | 0 | 0 |
| chrUn_gl000234        | 0 | 0 | 0 | 0 |
| chrUn_gl000235        | 0 | 0 | 0 | 0 |
| chrUn_gl000236        | 0 | 0 | 0 | 0 |
| chrUn_gl000237        | 0 | 0 | 0 | 0 |
| chrUn_gl000238        | 0 | 0 | 0 | 0 |
| chrUn_gl000239        | 0 | 0 | 0 | 0 |
| chrUn_gl000240        | 0 | 0 | 0 | 0 |
| chrUn_gl000241        | 0 | 0 | 0 | 0 |
| chrUn_gl000242        | 0 | 0 | 0 | 0 |
| chrUn_gl000243        | 0 | 0 | 0 | 0 |
| chrUn_gl000244        | 0 | 0 | 0 | 0 |
| chrUn_gl000245        | 0 | 0 | 0 | 0 |



|                |   |   |   |   |
|----------------|---|---|---|---|
| chrUn_gl000246 | 0 | 0 | 0 | 0 |
| chrUn_gl000247 | 0 | 0 | 0 | 0 |
| chrUn_gl000248 | 0 | 0 | 0 | 0 |
| chrUn_gl000249 | 0 | 0 | 0 | 0 |

## Coverage across reference

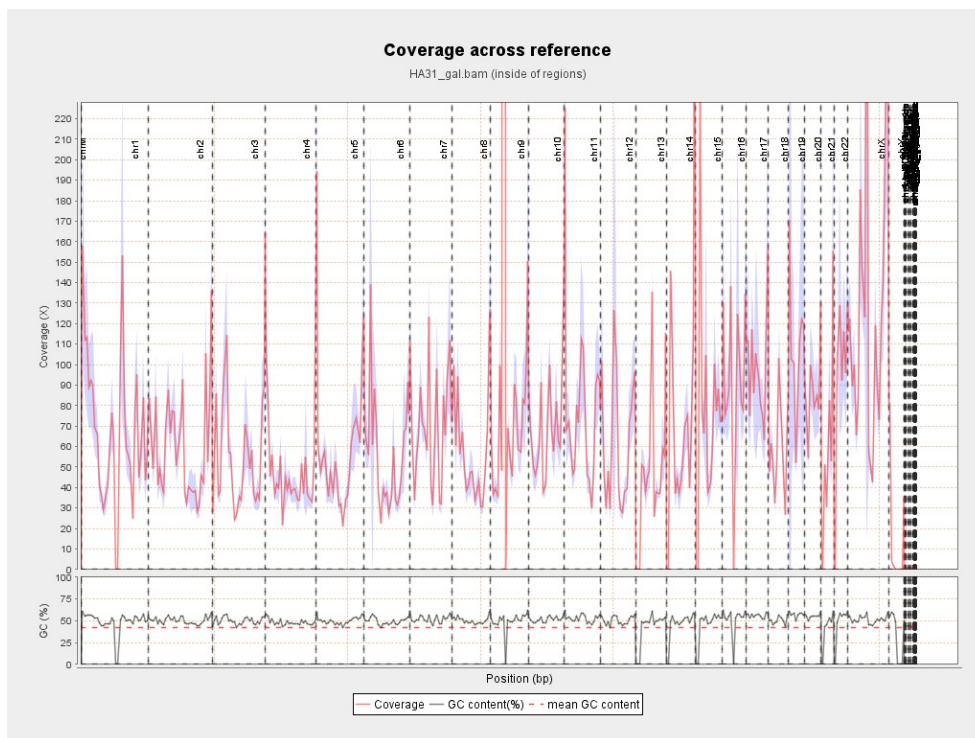

## Coverage Histogram

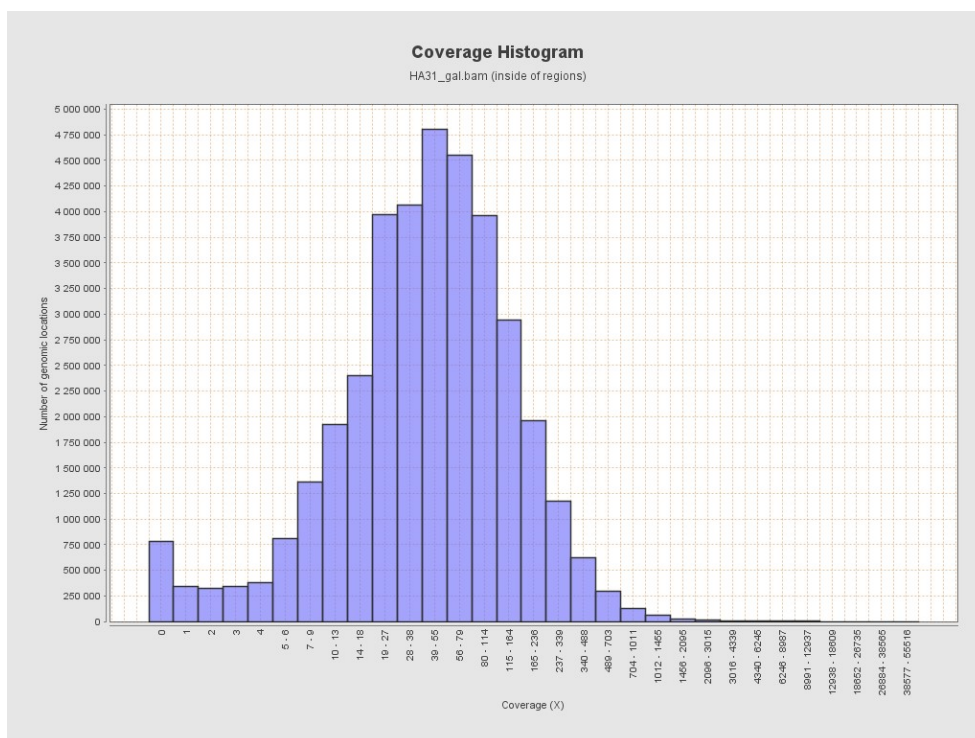

## Coverage Histogram (0-50X)

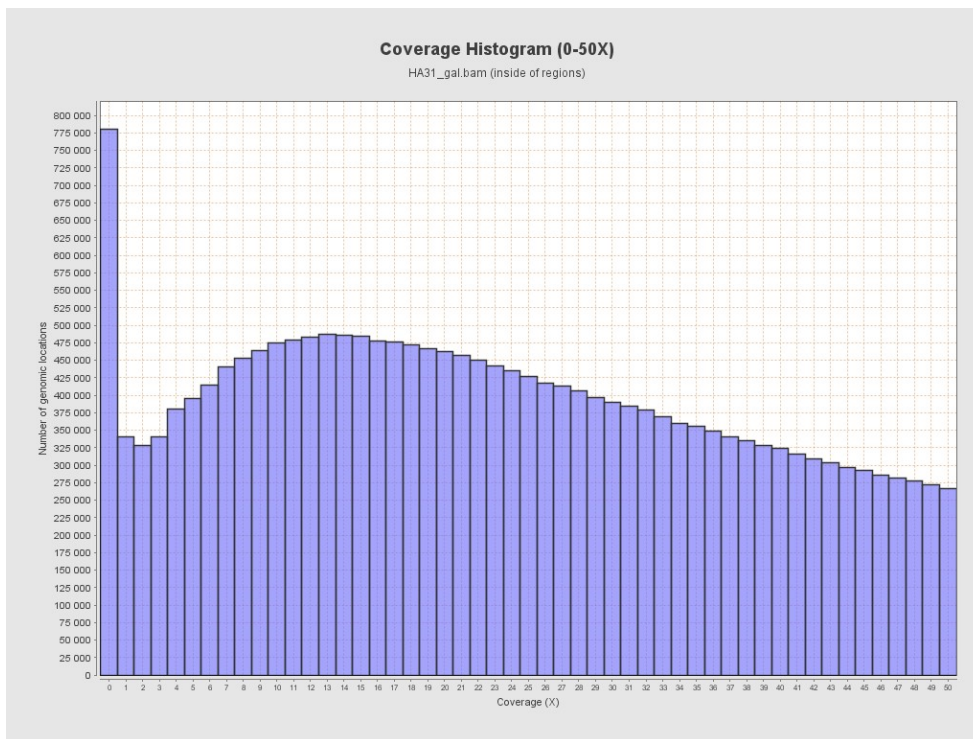

## Genome Fraction Coverage

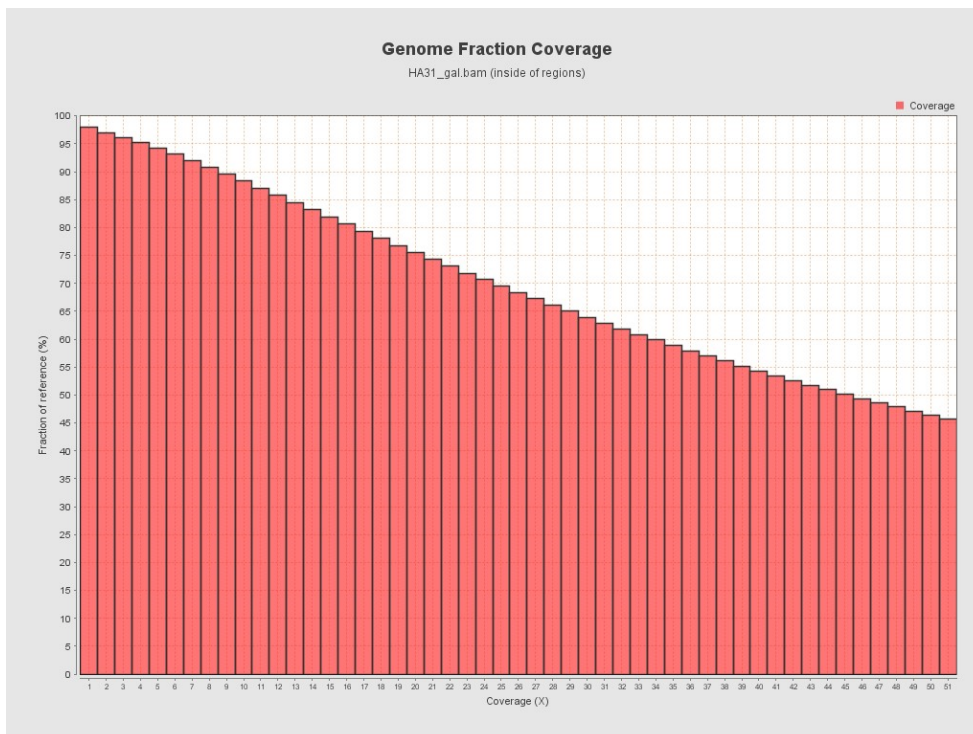

## Duplication Rate Histogram

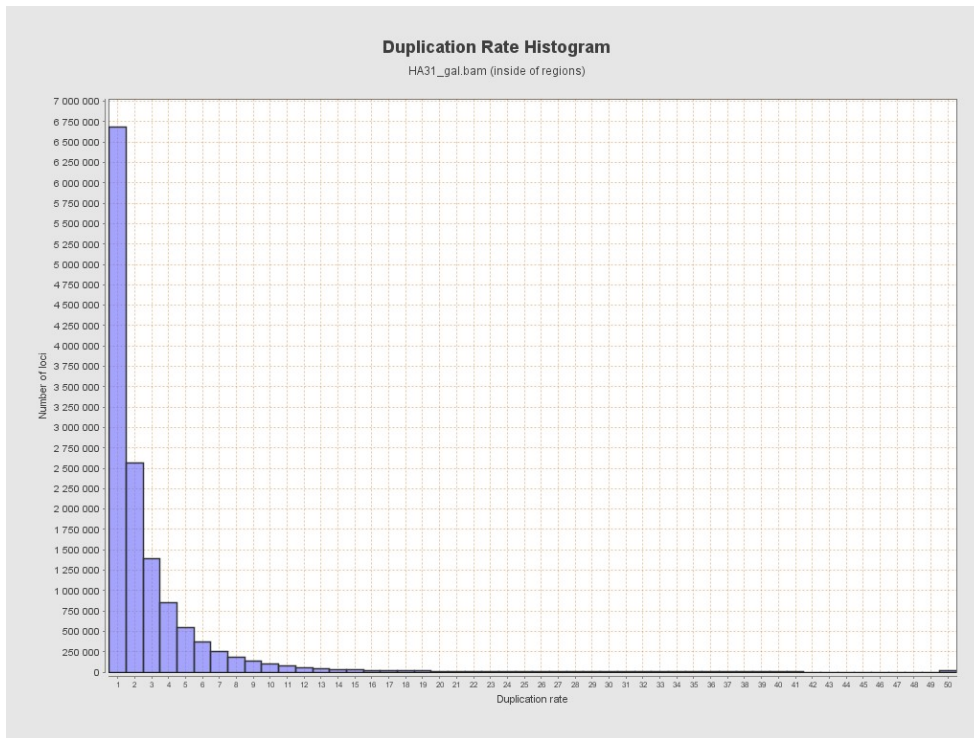

## Mapped Reads Nucleotide Content

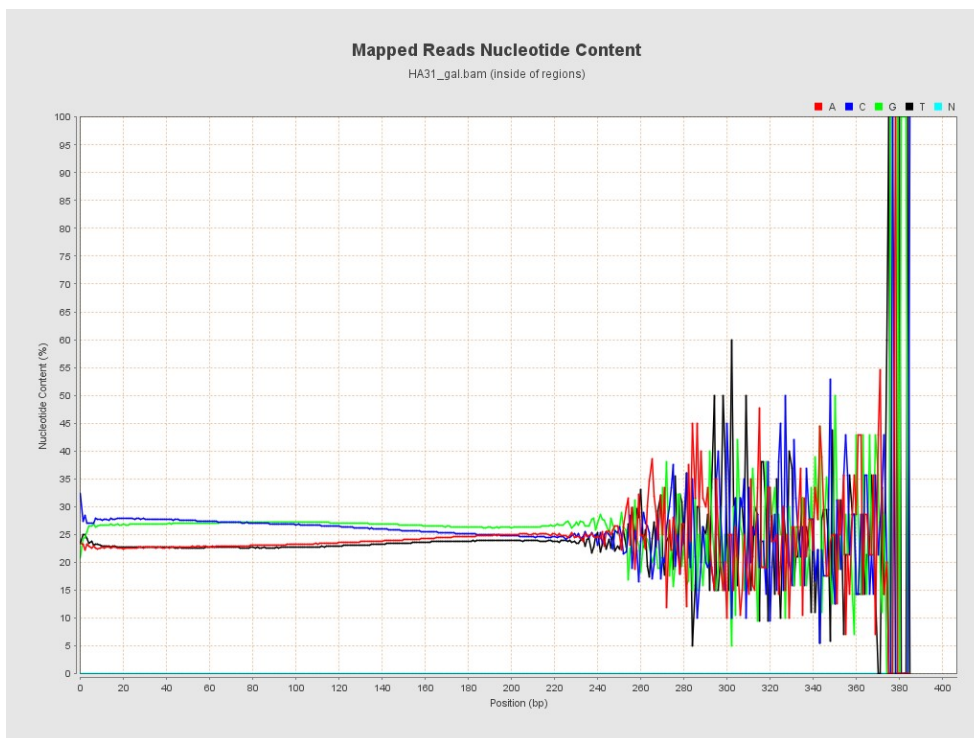

## Mapped Reads GC-content Distribution

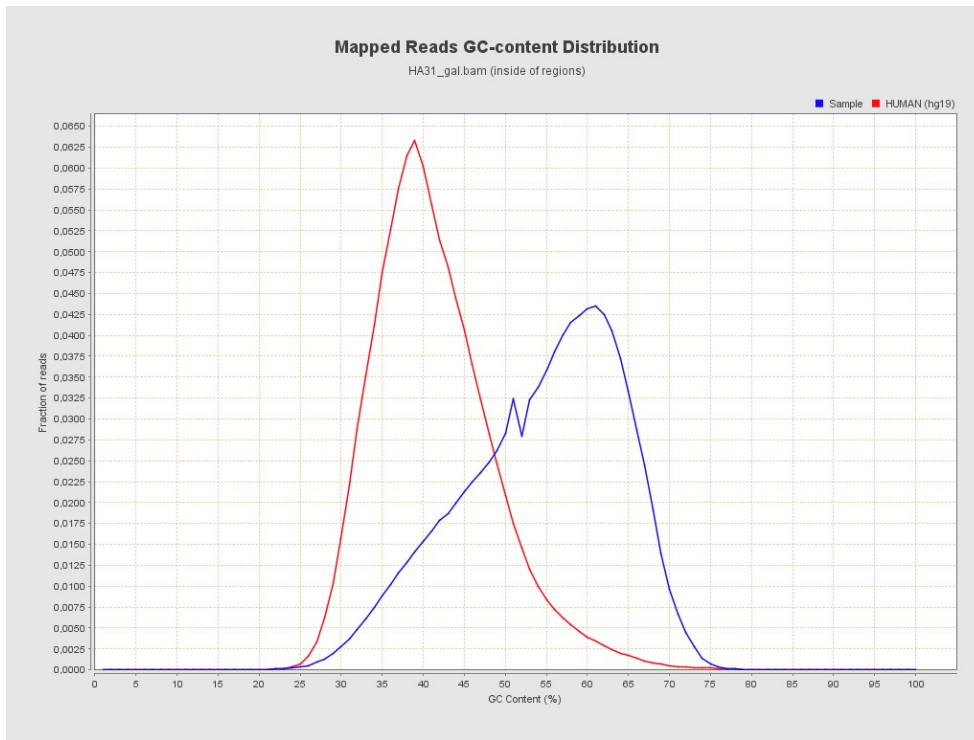

## Mapped Reads Clipping Profile

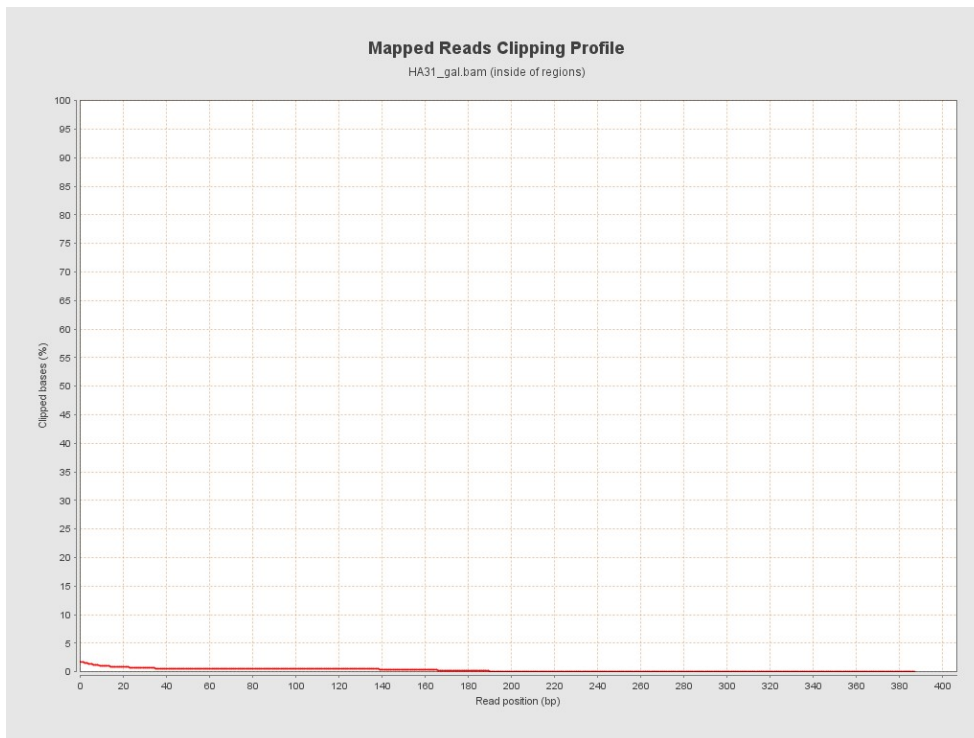

## Homopolymer Indels

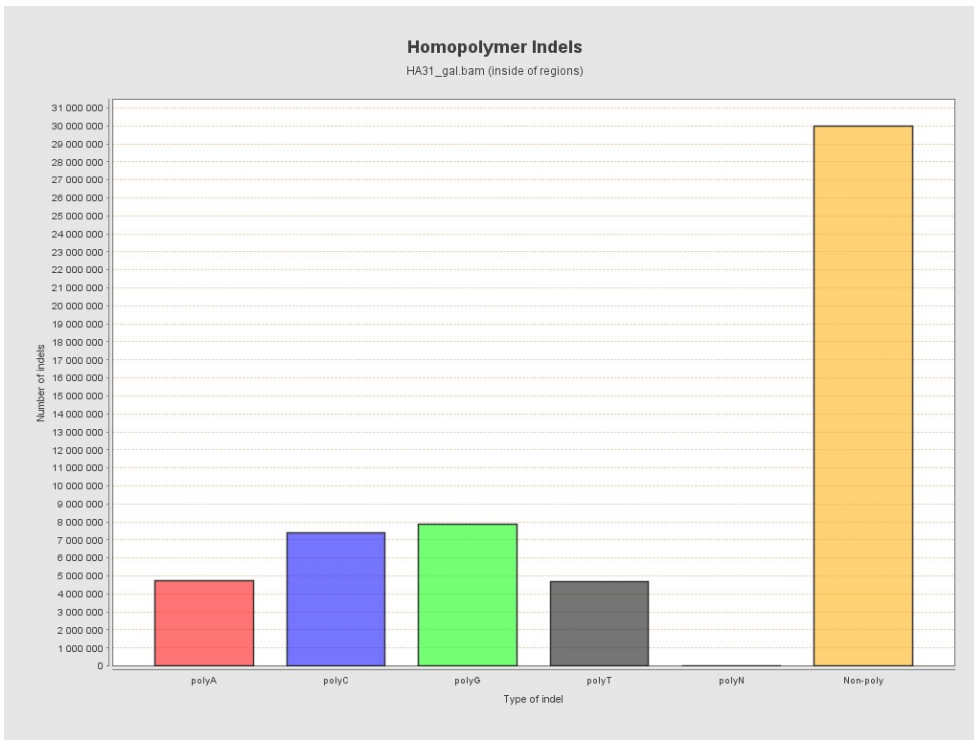

## Mapping Quality Across Reference

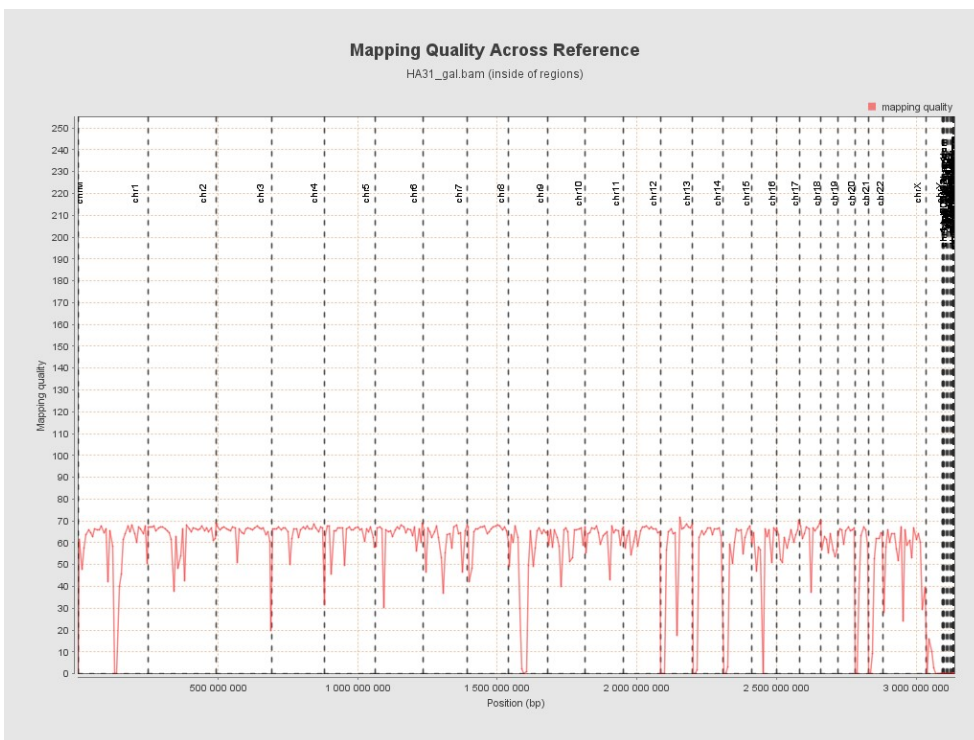

## Mapping Quality Histogram

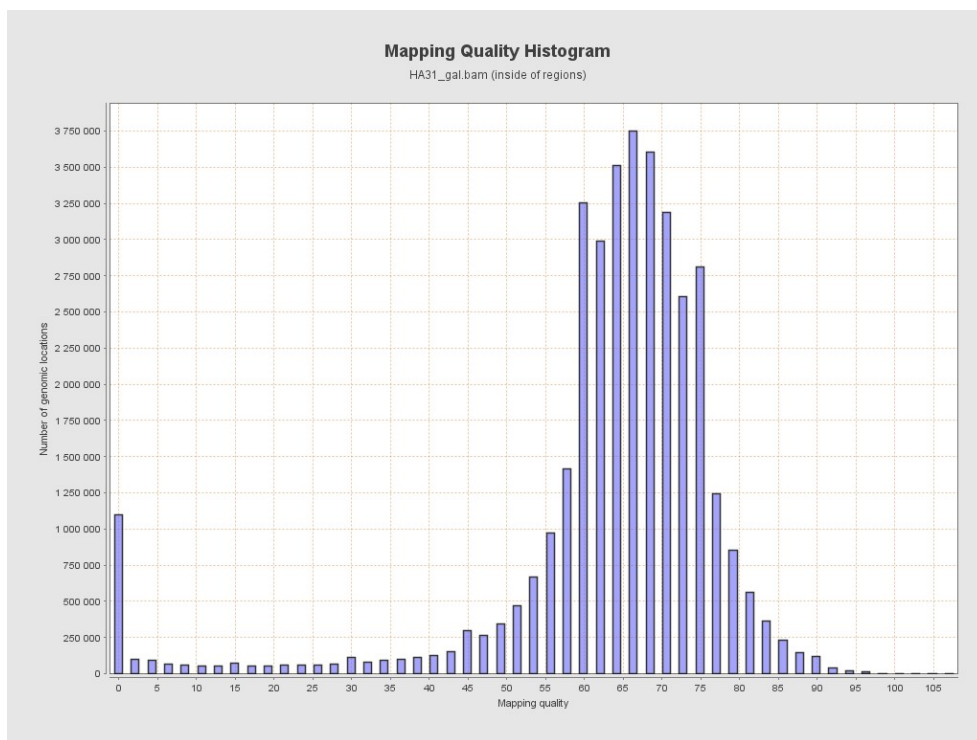

2016/11/08 10:22:17

Generated by QualiMap v.2.2.1
